1 **Short title: Photosystem II-PsbS/Psb27 Activated by Bicarbonate**

2

3 **Bicarbonate Activation of Monomeric Photosystem II-PsbS/Psb27**  
4 **Complex**

5

6 **Andrea Fantuzzi<sup>a1</sup>, Patrycja Haniewicz<sup>bc1</sup>, Domenica Farci<sup>d</sup>, M. Cecilia Loi<sup>e</sup>, Keunha Park<sup>a</sup>,**  
7 **Claudia Büchel<sup>f</sup>, Matthias Bochtler<sup>cg</sup>, A. William Rutherford<sup>a\*†</sup>, Dario Piano<sup>ce†</sup>**

8

9 *<sup>a</sup>Department of Life Sciences, Imperial College London, London SW7 2AZ, United Kingdom;*

10 *<sup>b</sup>Department of Plant Physiology, Warsaw University of Life Sciences - SGGW, Nowoursynowska*  
11 *Str. 159, 02-776, Warsaw, Poland;*

12 *<sup>c</sup>International Institute of Molecular and Cell Biology, Trojdena 4, 02-109 Warsaw, Poland;*

13 *<sup>d</sup> Department of Chemistry, Umeå University, Linnaeus väg 6, Umeå, Sweden;*

14 *<sup>e</sup>Department of Life and Environmental Sciences, University of Cagliari, V.le S. Ignazio da Laconi*  
15 *13, 09123 Cagliari, Italy;*

16 *<sup>f</sup>Institute of Molecular Biosciences, University of Frankfurt, Max von Laue Straße 9, 60438*  
17 *Frankfurt am Main, Germany;*

18 *<sup>g</sup>Polish Academy of Science, Institute of Biochemistry and Biophysics, Pawinskiego 5a, 02-106*  
19 *Warsaw, Poland.*

20

21 <sup>1</sup> these authors contributed equally to this work.

22

23 \* corresponding author: [a.rutherford@imperial.ac.uk](mailto:a.rutherford@imperial.ac.uk)

24 †Senior author

25

26

27 **Keywords:** photosynthesis, photoprotection, photoassembly, photoactivation, thylakoid  
28 membranes, lamellae region, *Nicotiana tabacum*

29

30

31 **One sentence summary**

32 A photosystem II monomer with PsbS and Psb27 as additional subunits, is inactive as isolated but  
33 activated by bicarbonate, and is attributed to be a late-stage intermediate in photoassembly.

34

35

36

37 **ORCID**

38 AF: 0000-0002-7026-2175

39 AWR: 0000-0002-3124-154X

40 DP: 0000-0003-2980-7572

41 PH: 0000-0002-6298-7184

42 DF: 0000-0002-3691-2699

43 MCL: 0000-0002-2708-4019

44 CL: 0000-0001-6640-7610

45 MB: 0000-0001-7884-4463

46

47

48

49

## 50 **Abstract**

51

52 In thylakoid membranes, Photosystem II monomers from the stromal lamellae contain the subunits  
53 PsbS and Psb27 (PSII<sub>m</sub>-S/27), while Photosystem II monomers from granal regions (PSII<sub>m</sub>) lack  
54 these subunits. Here, we have isolated and characterised these two types of Photosystem II  
55 complexes. The PSII<sub>m</sub>-S/27 showed enhanced fluorescence, the near-absence of oxygen evolution,  
56 as well as limited and slow electron transfer from Q<sub>A</sub> to Q<sub>B</sub> compared to the near-normal activities  
57 in the granal PSII<sub>m</sub>. However, when bicarbonate was added to the PSII<sub>m</sub>-S/27, water splitting and  
58 Q<sub>A</sub> to Q<sub>B</sub> electron transfer rates were comparable to those in granal PSII<sub>m</sub>. The findings suggest that  
59 the binding of PsbS and/or Psb27 inhibits forward electron transfer and lowers the binding affinity  
60 for the bicarbonate. This can be rationalized in terms of the recently discovered photoprotection role  
61 played by bicarbonate binding via the redox tuning of the Q<sub>A</sub>/Q<sub>A</sub><sup>•-</sup> couple, which controls the  
62 charge recombination route, and this limits chlorophyll triplet mediated <sup>1</sup>O<sub>2</sub> formation (Brinkert K  
63 et al. (2016) Proc Natl Acad Sci U S A. 113(43):12144-12149). These findings suggest that PSII<sub>m</sub>-  
64 S/27 is an intermediate in the assembly of PSII in which PsbS and/or Psb27 restrict PSII activity  
65 while in transit, by using a bicarbonate-mediated switch and protective mechanism.

66

67

68

69

70

## 71 **Introduction**

72 Oxygenic photosynthesis is a light-driven biochemical process providing the biosphere with organic  
73 carbon, energy, and molecular oxygen (Johnson, 2016). In higher plants, this process takes place in  
74 the chloroplast, a specialized organelle consisting of outer and inner membranes forming a network  
75 of photosynthetic membranes named thylakoids (Albertsson, 2001; Vothknecht and Westhoff,  
76 2002). The protein composition of the different portions of these membranes are distinct, showing  
77 segregation of the photosystems. Photosystem II (PSII) is mainly present in the appressed granal  
78 regions, while Photosystem I (PSI) is found in the non-appressed regions of the granal margins and  
79 in the stromal lamellae (Andersson and Anderson, 1980). Dynamic responses to various  
80 environmental factors have been shown to change the ultrastructure and composition of the  
81 membranes and photosystems (Ruban and Johnson, 2015; Kirchoff, 2019).

82 In higher plants, the organization of thylakoid membranes also reflects the partition of  
83 different kinds of PSII, which are assembled and repaired in the stromal lamellae, while the fully  
84 functional PSII complexes are located in the grana (Andersson and Anderson, 1980; Danielsson et  
85 al., 2006) (Fig. 1). The small fraction of PSII complexes that are found in stromal lamellae are  
86 mainly PSII monomers (PSII<sub>m</sub>) and a series of smaller assembly intermediates. In contrast, the  
87 grana are dominated by PSII dimers that can form a range of complexes with chlorophyll antenna  
88 proteins, including Light Harvesting Complex II (LHCII), forming PSII-LHCII (Danielsson et al.,  
89 2006; Watanabe et al., 2009; Haniewicz et al., 2013).

90 PSII, the water/plastoquinone photo-oxidoreductase, uses the energy of light to drive charge  
91 separation, oxidise water and reduce plastoquinone. The photochemistry occurs as a one-  
92 photon/one-electron reaction four times sequentially to accumulate the 4 oxidising equivalents  
93 necessary for water oxidation and oxygen release at the Mn<sub>4</sub>CaO<sub>5</sub> active site on the luminal side of  
94 PSII (Dau and Zaharieva, 2009). An exchangeable quinone, Q<sub>B</sub>, accepts 2 electrons and 2 protons  
95 sequentially, before it is released as Q<sub>B</sub>H<sub>2</sub> from the stromal side of PSII into the PQ/PQH<sub>2</sub> pool in  
96 the membrane (De Causmaecker et al., 2019). The sequential electron transfer steps involve the  
97 formation of a stable intermediate, Q<sub>B</sub><sup>•-</sup>, that can back-react via Q<sub>A</sub><sup>•-</sup> with the semi-stable, charge  
98 accumulation intermediates of the Mn<sub>4</sub>CaO<sub>5</sub> cluster (Rutherford et al., 1982). This back reaction  
99 occurs via the thermal repopulation of the P<sup>•+</sup>Pheo<sup>•-</sup> state, which recombines mainly by a route  
100 forming the chlorophyll triplet state <sup>3</sup>P<sub>680</sub> (Rutherford et al., 1981). This triplet state reacts with  
101 oxygen to form singlet oxygen <sup>1</sup>O<sub>2</sub> (Krieger-Liszkay, 2005; Rutherford et al., 2012). The <sup>1</sup>O<sub>2</sub>  
102 generated causes damage to PSII (Krieger-Liszkay, 2005). Other reactive oxygen species, generated

103 by reductive and oxidative processes in PSII, might also contribute to damage (Pospíšil, 2016).

104         Repairing the damage is an energetically costly process since proteins and cofactors must be  
105 synthesized and replaced to maintain efficient photosynthetic activity (Komenda et al., 2012;  
106 Tikkanen and Aro, 2012). This takes place in the stromal lamellae via a stepwise assembly of  
107 subcomplexes (Komenda et al., 2012; Nickelsen and Rengstl, 2013; Tomizioli et al., 2014;  
108 Puthiyaveetil et al., 2014). A large variety of PSII protein complexes are present in the stroma  
109 lamellae, with partially assembled systems co-existing with the PSII in different oligomeric states  
110 and different levels of activity (Danielsson et al., 2006; Haniewicz et al., 2013; Tomizioli et al.,  
111 2014; Puthiyaveetil et al., 2014). Inactive PSII from the stromal lamellae have been studied for  
112 decades (Melis, 1985; Lavergne and Leci 1993), and it was reported that 10-20% of PSII in the  
113 chloroplast were inactive and this was due to blocked forward electron transfer and not due to a lack  
114 of oxidised plastoquinone (Lavergne and Leci, 1993).

115         The complexity of the assembly/repair cycle, together with the low abundance of most of the  
116 intermediate complexes, means that our understanding of it is still evolving (Komenda et al., 2012;  
117 Nickelsen and Rengstl, 2013). Due to the low concentration, instability and intrinsically transient  
118 nature of these assembly intermediates, their isolation has required specific strategies: 1) the  
119 generation of mutants that lack either specific assembly factors or small PSII subunits, resulting in  
120 the accumulation of assembly intermediates (Komenda et al., 2002; Roose and Pakrasi, 2008;  
121 Zabert et al., 2021; Huang et al., 2021); and/or 2) tagging one of the PSII subunits to allow isolation  
122 of low concentration intermediates by affinity chromatography (Nowaczyk et al., 2006; Liu et al.,  
123 2011). Differential fractionation (Danielsson et al., 2006) and more recently differential  
124 solubilisation (Fey et al., 2008; Haniewicz et al., 2013) allowed the isolation of some of the sub-  
125 populations of PSII. Fractions originating from the lamellae and the granal margins (Haniewicz et  
126 al., 2013; Haniewicz et al., 2015) yielded a monomeric PSII containing two additional subunits,  
127 PsbS and Psb27, which are absent in functional granal PSII (Haniewicz et al., 2015). While Psb27  
128 has been shown to bind to PSII sub-complexes and to play a role in PSII assembly (Nowaczky et  
129 al., 2006; Roose et al., 2008), PsbS has been associated, directly or indirectly, with photoprotection  
130 mechanisms via non-photochemical fluorescence quenching (Niyogi and Truong, 2013; Ruban et  
131 al., 2016; Bassi and Dall'Osto, 2021).

132         Since its discovery in 1984 (Ljungberg et al., 1984), the role of PsbS has been controversial  
133 (Niyogi and Truong, 2013; Fan et al., 2015; Ware et al., 2015; Ruban et al., 2016; Dall'Osto et al.,  
134 2017; Bassi and Dall'Osto, 2021). Despite the availability of a PsbS crystallographic structure (Fan  
135 et al., 2015), there is still a debate about its basic components. The presence of chlorophyll,  
136 xanthophyll (Correa-Galvis et al., 2016; Gachek et al., 2019) and its role as a luminal pH sensor  
137 (Bergantino et al., 2003; Li et al., 2004; Roach and Krieger-Liszkay, 2012; Liguori et al., 2019), are

138 still debated. The primary role of PsbS is thought to be a protective one, as a key player in some  
139 aspects of non-photochemical quenching (NPQ) (Niyogi and Truong, 2013; Ruban et al., 2016;  
140 Bassi and Dall'Osto, 2021). Several reports showed the involvement, either direct or indirect, of  
141 PsbS, in quenching the excess of energy in free-LHCII complexes and/or in LHCII associated with  
142 PSII (Sacharz et al., 2017). A photo-protective role has also been suggested to act via CP47 and the  
143 minor external antennas of PSII (Correa-Galvis et al., 2016). However, to date, there is no  
144 consensus on a mechanism linking PsbS with NPQ and the xanthophyll cycle that would explain  
145 PsbS-mediated photoprotection and its role as a pH sensor.

146 PsbS has been found to be bound stoichiometrically to purified PSII cores only in samples  
147 originating from the lamellae and granal margins of *Tobacco* thylakoids (Haniewicz et al., 2013).  
148 Indirect evidence of its presence in PSII dimers and monomers, and its association to the PSII-  
149 LHCII complexes in grana have also been reported (Bergantino et al., 2003; Caffari et al., 2009;  
150 Correa-Galvis et al., 2016).

151 Psb27 is present in eukaryotes and prokaryotes, though most of the information relates to the  
152 cyanobacterial form. Important differences, such as the eukaryotic Psb27 lacking the covalently  
153 bound lipid moiety that is present in the cyanobacteria, raise doubts on whether they have the same  
154 location and function. In cyanobacteria, Psb27 is involved in the assembly of the  $Mn_4CaO_5$  cluster  
155 and was found to be associated with inactive PSII lacking the three extrinsic proteins PsbO, PsbU  
156 and PsbV (Roose et al., 2004; Nowaczyk et al., 2006). It was found to play a significant role during  
157 PSII D1 repair, where it was suggested to bind to CP43 and facilitate the assembly of the Mn-  
158 cluster by providing greater accessibility and preventing premature association of the other extrinsic  
159 proteins (Nowaczyk et al., 2006; Roose and Pakrasi, 2008). Its location close to the CP43 loop E  
160 and its allosteric role in weakening the binding of the extrinsic proteins (Liu et al., 2011) was  
161 confirmed and clarified in two recent cryo-EM structures (Zabert et al., 2021; Huang et al., 2021).  
162 Its role in facilitating the photoactivation of the Mn-cluster was found to be more complex than  
163 simply displacing the extrinsic proteins from the apo-PSII (Avramov et al., 2020). In higher plants,  
164 this subunit is found to exist in two isoforms, Psb27-1 and Psb27-2 (Chen et al., 2006; Wei et al.,  
165 2010). Their specific function is still under investigation, with Psb27-1 found to be required for the  
166 efficient repair of photo-damaged PSII (Chen et al., 2006) but also to play a role in the state  
167 transition mechanism (Dietzel et al., 2011), while Psb27-2 is suggested to play an important role in  
168 the processing of the precursor form of D1 (Wei et al., 2010).

169 In the present study we have characterized a PSII monomer containing PsbS and Psb27,  
170 which was isolated from the stromal lamellae and the grana margins (PSII<sub>m</sub>-S/27). We compared  
171 this complex with the PSII monomers isolated from the grana stacks (PSII<sub>m</sub>). The data indicate an  
172 unexpected role for PsbS and/or the Psb27 protecting newly assembled and photoactivated PSII by

173 inhibiting electron transfer, an inhibition that is reversed by bicarbonate binding.

174

175

## 176 **Results**

### 177 **Association of PsbS and Psb27 to PSII monomers**

178 Two types of purified Photosystem II core complexes, PSII<sub>m</sub> and the PSII<sub>m</sub>-S/27, were isolated  
179 according to the procedures previously described in Haniewicz *et al.* (2013) and in Haniewicz *et al.*  
180 (2015), where it was demonstrated that the PSII<sub>m</sub> and the PSII<sub>m</sub>-S/27 originate from the grana  
181 stacks and margins/stromal lamellae, respectively (Fig 1). The two types of monomeric PSII were  
182 compared by SDS-PAGE and we confirmed the previous observation that they had similar  
183 composition in terms of protein subunits, except for the two additional bands in the PSII<sub>m</sub>-S/27 at  
184 20 and 13 kDa (Fig. 2A), attributed to the PsbS and Psb27 subunits, respectively (Haniewicz *et al.*,  
185 2013). These subunits were found to be stoichiometric with the other core subunits of PSII. Small  
186 differences in the sub-stoichiometric content of external antennas, which are mainly ascribed to  
187 CP26 and CP29, were also observed (see SI Appendix).

188

### 189 **Spectroscopic characterisation of PSII<sub>m</sub> and the PSII<sub>m</sub>-S/27**

190 UV-Vis absorption spectra of the PSII<sub>m</sub> and the PSII<sub>m</sub>-S/27 were recorded (Fig. 2B). When  
191 normalising the spectra at 675 nm, the comparison showed only minimal differences localised  
192 between 350 and 550 nm with the PSII<sub>m</sub>-S/27 showing slightly higher absorbance. As neither the  
193 Psb27 and PsbS have been shown to contain chromophores, these differences are more likely to be  
194 due to the small differences in CP26 and CP29 content of the samples.

195 Room-temperature fluorescence emission spectra were recorded for both PSII samples and showed  
196 a single peak at 681 and 682.5 nm for PSII<sub>m</sub>-S/27 and PSII<sub>m</sub>, respectively (Fig. 2C). In equally  
197 concentrated samples, the intensity of the emission peak was much higher (nearly double) for the  
198 PSII<sub>m</sub>-S/27 sample when compared with the PSII<sub>m</sub> (Fig. 2C).

199 The comparison of the circular dichroism spectra (Fig. 2D) for the PSII<sub>m</sub> and the PSII<sub>m</sub>-S/27  
200 samples showed differences that can be related to the small changes in the absorption spectra shown  
201 in the Fig. 2B. Overall, both spectra resemble a typical PSII spectrum (Alfonso *et al.*, 1994; Kraus  
202 *et al.*, 2005), suggesting that no major changes in the position or number of the cofactors is induced  
203 by the presence of PsbS and Psb27. However, in the PSII<sub>m</sub>-S/27 sample the spectral region between  
204 350 and 550 nm showed changes in peak intensity and position, with 3 minor bands at 427, 475,  
205 and 484 nm, respectively. The Q<sub>y</sub> band showed the typical PSII double peak in both samples  
206 (Alfonso *et al.*, 1994; Kraus *et al.*, 2005). In the PSII<sub>m</sub>-S/27 sample, these features were red-shifted  
207 by about 2 nm with respect to PSII<sub>m</sub> (Fig. 2D).



208

## 209 **Water oxidation catalytic activity**

210 The enzymatic activities of both PSII<sub>m</sub> and PSII<sub>m</sub>-S/27 were compared by measuring their oxygen  
211 evolution rates. PSII<sub>m</sub> showed good activity with rates of  $1030 \pm 13 \mu\text{mol O}_2 \text{ mgChl}^{-1} \text{ h}^{-1}$ . In  
212 contrast, PSII<sub>m</sub>-S/27 showed a drastically reduced activity of  $52 \pm 5 \mu\text{mol O}_2 \text{ mgChl}^{-1} \text{ h}^{-1}$  (Table 1).

213

## 214 **Electron transfer from $\text{Q}_\text{A}^{\bullet-}$ to $\text{Q}_\text{B}$ or $\text{Q}_\text{B}^{\bullet-}$**

215 PSII photochemistry was tested by measuring flash-induced chlorophyll fluorescence and  $\text{Q}_\text{A}^{\bullet-}$   
216 oxidation kinetics. The illumination with a single-saturating flash of a dark-adapted sample induces  
217 the reduction of  $\text{Q}_\text{A}$  to  $\text{Q}_\text{A}^{\bullet-}$  in most of the centres, with a resulting increase in the prompt  
218 fluorescence yield. Subsequent re-oxidation of  $\text{Q}_\text{A}^{\bullet-}$ , either by electron transfer to  $\text{Q}_\text{B}$  or  $\text{Q}_\text{B}^{\bullet-}$  or by  
219 recombination with  $\text{S}_2$ , results in the decay of the fluorescence yield (Croft and Wraight, 1983).

220 Figure 3A shows that both minimal fluorescence ( $F_0$ ) and maximal fluorescence ( $F_m$ ) yields were  
221 higher in the PSII<sub>m</sub>-S/27 sample (see SI Appendix). PSII<sub>m</sub> was found to be unstable during the  
222 measurements at room temperature, therefore experiments were performed at  $15^\circ\text{C}$  (Fig. 3B and D).  
223 This is likely to slow down some rates when compared to other measurements done at room  
224 temperature and when comparing them to the literature. The decay rates of the fluorescence yield  
225 are shown in Fig. 3B. PSII<sub>m</sub> kinetics are like those expected for functional PSII, while in PSII<sub>m</sub>-  
226 S/27 the fluorescence decayed  $\sim 10$  times more slowly, indicating a marked inhibition of forward  
227 electron transfer. The kinetics were fitted with three decay phases (Fig. 3B and Table 2) and the  
228 origins of the decay phases were assigned to forward and backward electron transfer reactions  
229 according to the literature (Vass et al., 1999).

230 The initial fast phase arises from  $\text{Q}_\text{A}^{\bullet-}$  forward electron transfer to either  $\text{Q}_\text{B}$  or  $\text{Q}_\text{B}^{\bullet-}$ . It has a  
231 rate of 1.9 ms and an amplitude of 31% for the PSII<sub>m</sub>, but a drastically reduced rate and amplitude  
232 of 17 ms and 7% amplitude for PSII<sub>m</sub>-S/27.

233 The middle phase is often assigned to be electron transfer from  $\text{Q}_\text{A}^{\bullet-}$  when the  $\text{Q}_\text{B}$  site is  
234 either empty or occupied by  $\text{Q}_\text{B}\text{H}_2$  at the time of the flash, and therefore the electron transfer rate is  
235 determined by the arrival of PQ into the  $\text{Q}_\text{B}$  site. For PSII<sub>m</sub> this phase shows an amplitude of 18%  
236 and a half-time of 85 ms, kinetics compatible with the usual assignment of this phase although on  
237 the slow side of the range and could indicate a contribution to this phase of charge recombination  
238 with TyrZ• in damaged centres. However, for PSII<sub>m</sub>-S/27, while the amplitude is like that in PSII<sub>m</sub>,  
239 the decay is 9-fold slower, with a  $t_{1/2} = 770$  ms. This is a very slow value for quinone exchange  
240 although slow quinone exchange is a feature of bicarbonate loss from the non-heme iron or  
241 bicarbonate replacement by other carboxylic acids (Shevela et al., 2012). This range of fluorescence  
242 decay is within those seen for  $\text{S}_2$  recombination with  $\text{Q}_\text{A}^{\bullet-}$  in PSII monomers (Zimmermann et al.,



243 2006) but it seems that in this material and at this temperature, this  $S_2Q_A^{\bullet-}$  recombination takes  
244 place more slowly (see below).

245 The third and slowest phase is usually attributed to the back reaction of  $Q_A^{\bullet-}$  with the  $S_2$  state  
246 of the Mn-cluster and thus this phase is seen when forward electron transfer is blocked due to  
247 reduction of the pool, modification of the  $Q_B$  site or binding of an herbicide in the  $Q_B$  site. This  
248 phase with a  $t_{1/2} = 23$ s seems to be present in about half of the centres in PSII<sub>m</sub>, this is in common  
249 with other reports from PSII<sub>m</sub> in the literature (Table 2). The slower rates compared with the  
250 literature values is due to the lower temperature (15°C) used here. The PSII<sub>m</sub>-S/27 sample showed  
251 even more of this phase, 68%, and a marked slow-down of the half-time to 180s.  
252 Thermoluminescence measurements (TL) of PSII<sub>m</sub> showed that upon a single saturating flash the  
253 PSII<sub>m</sub> presents a single peak at 22°C, while PSII<sub>m</sub>-S/27 presents a peak at 10°C with a shoulder at  
254 25°C (Fig. 3C and S1). These peaks may be attributed to  $S_2Q_A^{\bullet-}$  and  $S_2Q_B^{\bullet-}$  recombination  
255 respectively based on the typical TL peak temperatures (Rutherford et al 1982). The TL data suggest  
256 that the presence of PsbS and Psb27 block the electron transfer from  $Q_A^{\bullet-}$  to  $Q_B$ . This appears to  
257 agree with fluorescence kinetics presented above on the  $Q_A^{\bullet-}$  re-oxidation kinetic considering the  
258 temperature of the measurement.

259

### 260 **Effect of the inhibitor DCMU on the $Q_A^{\bullet-}$ oxidation kinetics**

261 To investigate the possible interference of PsbS and/or Psb27 with  $Q_B$  binding, we measured the  
262 fluorescence yield relaxation kinetics in the presence of the PSII inhibitor 3-(3,4-dichlorophenyl)-  
263 1,1-dimethylurea (DCMU) (Fig. 3D). This inhibitor binds to the  $Q_B$  binding site and blocks the  
264 electron transfer from  $Q_A^{\bullet-}$ , leaving the recombination to  $S_2$  as the only possible route for the  
265 electrons. The kinetics of  $Q_A^{\bullet-}$  oxidation will, therefore, be dominated by the slow phase associated  
266 with the recombination with  $S_2$ . Addition of DCMU to both the PSII<sub>m</sub> and the PSII<sub>m</sub>-S/27 resulted  
267 in kinetics with very similar half-times of approximately 30-40 s in 50-60% of the centres, while the  
268 remaining 40-50% appear to show longer decaying times. This observation suggests that the  
269 presence of PsbS and/or Psb27 does not interfere with the DCMU binding nor the resulting  
270 inhibition. These rates are longer than those typically measured in fully functional plant PSII, where  
271 it is ~1 second, but this is at least partially explained by the experiments being done at 15°C to  
272 preserve the intactness of PSII<sub>m</sub>. The slow phases of  $S_2Q_A^{\bullet-}$  decay measured with DCMU are similar  
273 in PSII<sub>m</sub> and PSII<sub>m</sub>-S/27, while in the absence of DCMU the slow phase of fluorescence decay was  
274 significantly slower in PSII<sub>m</sub>-S/27 (Fig. 3B and D).

275 A notable difference in the kinetics is shown for the PSII<sub>m</sub> in the presence of DCMU, where  
276 an additional faster phase is present (Fig. 3D) with ~20% amplitude and  $t_{1/2} = 50$  ms. This phase  
277 could correspond to  $Tyr_Z \bullet Q_A^{\bullet-}$  recombination, a reaction reflecting PSII centres that lack the Mn-

278 cluster. This is consistent with the observed instability of the PSII<sub>m</sub>.

279

### 280 **Effect of bicarbonate on PSII<sub>m</sub>-S/27**

281 Given the recently discovered protective role of bicarbonate and the demonstration that it can be  
282 lost under physiological conditions (Brinkert et al., 2016), we investigated the effect of bicarbonate  
283 on PSII<sub>m</sub>-S/27. These experiments were done at 20°C, a temperature at which the effect of  
284 bicarbonate has been characterised and the PSII<sub>m</sub>-S/27 was stable. The addition of 5 mM  
285 bicarbonate to the PSII<sub>m</sub>-S/27 sample resulted in it becoming activated to a level comparable to the  
286 functional PSII<sub>m</sub> (Fig. 4A). The kinetics of  $Q_A^{\bullet-}$  oxidation after addition of bicarbonate showed an  
287 acceleration of all three fluorescence decay phases to rates like those measured in the PSII<sub>m</sub> and  
288 typical of a functional PSII monomer (Zimmermann et al., 2006). In the presence of bicarbonate,  
289 the fast phase  $t_{1/2}$  decreased from 67 ms to 3 ms, the middle phase decreased from 982 ms to 115  
290 ms, and the slow phase from 43 to 13 s (Table 2). The amplitude of the fast phase also appeared to  
291 increase when bicarbonate was present, but this is less certain because of the influence of the poorer  
292 fitting of the equivalent phase but with slower kinetic, in the PSII<sub>m</sub>-S/27 lacking bicarbonate.

293 The addition of DCMU to the bicarbonate containing PSII<sub>m</sub>-S/27 complex yielded almost  
294 the same kinetic profile as seen in the absence of the added 5 mM bicarbonate (Fig. 4B). The fitting  
295 of the data showed two main phases, the first with a half-time of approximately 1 s and an  
296 amplitude of 70%, consistent with  $S_2Q_A^{\bullet-}$  recombination, the second with a half-time of  
297 approximately 60 s and an amplitude of 30%. The longer half-life of this second phase is consistent  
298 with the oxidation of a relatively stable donor (e.g. from  $Mn^{2+}$ , TyrD, the side path donors) giving  
299 rise to a long-lived  $Q_A^{\bullet-}$  (Nixon et al., 1992; Debus et al., 2000).

300 Oxygen evolution assays performed in presence of 5 mM bicarbonate showed a ~15-fold  
301 increase in the activity of PSII<sub>m</sub>-S/27, reaching levels ( $795 \pm 8 \mu\text{mol O}_2 \text{ mg Chl}^{-1} \text{ h}^{-1}$ ) that are ~70%  
302 of the values recorded for the PSII<sub>m</sub> (Table 1). These results show that the PSII<sub>m</sub>-S/27 samples  
303 contain a fully functional Mn-cluster in at least 70% of the centers. Both kinetics and oxygen  
304 evolution measurements show that approximately 30% of the centers lack catalytic activity and  
305 these show a kinetic profile that is consistent with either partial Mn occupancy or Mn-free PSII.

306 The kinetics of oxidation was studied as a function of bicarbonate concentration. The  
307 kinetics accelerated as the bicarbonate concentration was increased. When the fluorescence value at  
308 0.2 s were plotted, and the value obtained prior to bicarbonate addition was subtracted (Fig. 4C), the  
309 curve showed hyperbolic behavior saturating at 5 mM. Data fitting with a hyperbolic model for  
310 ligand binding yielded an apparent dissociation constant for the bicarbonate of ~ 600  $\mu\text{M}$ .

311 TL (Fig. 4D) of PSII<sub>m</sub>-S/27 with no addition showed a peak centered at 10°C attributed to  
312  $S_2Q_A^{\bullet-}$  recombination, while in the presence of bicarbonate the TL intensity increased with a

313 dominant peak at 27°C, typical of  $S_2Q_B^{\bullet-}$  recombination, and an increase in  $S_2Q_A^{\bullet-}$  TL at 10°C,  
314 which is seen as shoulder. The TL results show that PSII<sub>m</sub>-S/27 has inhibited forward electron  
315 transfer from  $Q_A^{\bullet-}$  and only a low level of luminescence arising from  $S_2Q_A^{\bullet-}$ . Addition of  
316 bicarbonate resulted in the recovery of near-normal behavior with the formation of  $S_2Q_B^{\bullet-}$   
317 recombination in most of the centres. In a fraction of centres the bicarbonate did not reconstitute  
318 electron transfer to  $Q_B^{\bullet-}$  but did result in more  $S_2Q_A^{\bullet-}$  recombination.

319 Finally, it was also observed that the peak intensity and position of the room temperature  
320 fluorescence was essentially unaffected by the addition of 5 mM bicarbonate (Fig. S2).

321

## 322 Discussion

323 Here, we compared two types of PSII monomers, i) those isolated from grana, PSII<sub>m</sub>, and ii) those  
324 isolated from the stromal lamellae and granal margins, which contain stoichiometric amounts of  
325 P<sub>sb</sub>S and P<sub>sb</sub>27, PSII<sub>m</sub>-S/27 (Haniewicz *et al.*, 2013; Haniewicz *et al.*, 2015). Comparison of the  
326 UV-Vis absorption and CD spectra (Figs. 2B and 2D) in the two types of PSII monomers, showed  
327 only minimal differences (see SI Appendix). The most significant difference between the two  
328 complexes is the near absence of activity in PSII<sub>m</sub>-S/27 compared to the high activity in the PSII<sub>m</sub>.  
329 Both the oxygen evolution rates (Table 1) and the kinetics of  $Q_A^{\bullet-}$  oxidation (Fig. 3 and Table 2)  
330 were strongly inhibited in PSII<sub>m</sub>-S/27. The addition of DCMU to PSII<sub>m</sub>-S/27 blocked oxygen  
331 evolution and shut down the residual, sub-second fluorescence decay, due the near-complete block  
332 of forward electron transfer from  $Q_A^{\bullet-}$ . The DCMU-treated PSII<sub>m</sub>-S/27 showed 70% of the centres  
333 with the typical seconds-timescale kinetics of  $S_2Q_A^{\bullet-}$  recombination (Fig. 3D and 4B), while the rest  
334 of the centres showed much slower rates of  $Q_A^{\bullet-}$  decay, presumably due to the electron donation  
335 from a more stable electron donor in a fraction of centres. These observations are comparable to  
336 those made by Lavergne and Leci (1993) when investigating the fraction of inactive PSII that is  
337 normally present in green algal cells. The inactive PSII in algal cells reported earlier (Lavergne and  
338 Leci, 1993) could be the algal equivalent of the PSII<sub>m</sub>-S/27 described here.

339 The kinetic characteristics of the impaired  $Q_A^{\bullet-}$  oxidation in PSII<sub>m</sub>-S/27 indicate  
340 heterogeneity and suggest that forward electron transfer,  $Q_A^{\bullet-}$  to  $Q_B$  and to  $Q_B^{\bullet-}$ , and the exchange  
341 of  $Q_BH_2$ , are all inhibited. These events all involve protonation. The thermoluminescence of PSII<sub>m</sub>-  
342 S/27 had a low intensity but the peak positions of the residual TL were consistent with inhibition of  
343 electron transfer from  $Q_A^{\bullet-}$  to  $Q_B$  or  $Q_B^{\bullet-}$ , with the main peak at 10°C, typical of  $S_2Q_A^{\bullet-}$   
344 recombination in inhibited centres, and only a very small shoulder at 25°C corresponding to the  
345  $S_2Q_B^{\bullet-}$  recombination in a small number of functional centres (Fig. 3C).

346 The inhibition of  $Q_A^{\bullet-}$  oxidation in PSII<sub>m</sub>-S/27 cannot be explained by the loss of  $Q_B$   
347 (except in a small fraction of the centres), as the addition of bicarbonate activated forward electron

348 transfer in most of the centres. Similarly, the weak TL intensity cannot be explained by the absence  
349 of the Mn cluster, as most of the centres were capable of water splitting when bicarbonate was  
350 added. The low luminescence of PSII<sub>m</sub>-S/27 prior to the addition of bicarbonate, and despite the  
351 presence of the Mn cluster and both quinones, could be due to an increase in the redox potential  
352  $Q_A^{\bullet-}$ , as occurs upon loss of the bicarbonate from granal PSII dimers (Brinkert et al., 2016). A  
353 sufficiently high redox potential is expected to result in the loss of radiative recombination  
354 (Rutherford et al., 2012).

355 The remarkable activation of the seemingly inactive PSII<sub>m</sub>-S/27 by millimolar  
356 concentrations of bicarbonate was manifest as the appearance of normal rates of forward electron  
357 transfer and water oxidation activity in at least 70% of the centres, as monitored by fluorescence  
358 kinetics, TL and O<sub>2</sub> evolution. The remaining 30% inactive centres did show a slow-down of the  
359 rate of  $Q_A^{\bullet-}$  reoxidation in the ~10 s range (Fig. 4A, Table 2). As these kinetics are much slower  
360 than typically found for electron transfer to Q<sub>B</sub> and Q<sub>B</sub><sup>•-</sup>, this observation could indicate the absence  
361 of Q<sub>B</sub> in the site in this fraction of the centers. However, as the 10 s phase is eliminated in the  
362 presence of DCMU and replaced by a much slower rate, ~100 s (Fig. 4B), this behaviour could  
363 indicate an unusually slow rate of electron transfer from  $Q_A^{\bullet-}$  to Q<sub>B</sub>. This could originate from a  
364 situation where the reduction potentials of Q<sub>A</sub>/Q<sub>A</sub><sup>•-</sup> and Q<sub>B</sub>/Q<sub>B</sub><sup>•-</sup> are similar. The reduction potential  
365 of Q<sub>A</sub>/Q<sub>A</sub><sup>•-</sup> is reported to shift toward that of Q<sub>B</sub>/Q<sub>B</sub><sup>•-</sup> when the Mn cluster is absent (Johnson et al.,  
366 1995), and it could be shifted even further when modified by the binding of the PsbS and Psb27  
367 subunits.

368 The major difference between the two types of PSII monomers studied here is that the  
369 PSII<sub>m</sub>-S/27 almost completely lacks activity until activated by the addition of bicarbonate. This  
370 difference is presumably due to the binding of PsbS and/or Psb27. It is not clear that this difference  
371 is due to one or the other of these polypeptides or to a combination of both. This uncertainty is  
372 shared with the recent structural work on other assembly intermediates in cyanobacterial systems  
373 (Huang et al., 2021; Zebert et al., 2021). Below we discuss the potential roles of the Psb27 and  
374 PsbS.

375 Psb27 in higher plants is relatively poorly studied, and is known to exist in two isoforms,  
376 Psb27-1 and Psb27-2 (Chen et al., 2006; Wei et al., 2010). In the present study, it was not possible  
377 to determine which of the two isoforms is bound to PSII<sub>m</sub>-S/27. Its suggested functions are  
378 associated with responses to photodamage and maturation of D1 in newly synthesised PSII (Chen et  
379 al., 2006; Wei et al., 2010). In cyanobacteria, Psb27 is involved in the assembly of the Mn<sub>4</sub>CaO<sub>5</sub>  
380 cluster, where it is suggested to facilitate photoassembly by allosterically regulating the binding of  
381 the extrinsic proteins, PsbO, PsbU, and PsbV (Nowaczyk et al., 2006; Roose and Pakrasi, 2008). In  
382 both *Synechocystis* sp PCC 6803 and *Thermosynechococcus elongatus*, Psb27 was found to be

383 associated with inactive PSII monomers and dimers in which the three extrinsic proteins were  
384 absent and either no Mn or sub-stoichiometric amounts of Mn were reported (Roose and Pakrasi,  
385 2004; Nowaczyk et al., 2006; Mamedov et al., 2007; Roose and Pakrasi, 2008). Nevertheless, PSII  
386 complexes with Psb27 bound in the presence of either PsbO alone, or the full complement of  
387 extrinsic proteins, were found in a range of conditions: 1) as PSII dimers in cold-stressed *T.*  
388 *elongatus* (Grasse et al., 2011), 2) in affinity purified His-tagged Psb27 in *Synechocystis* sp PCC  
389 6803 (Liu et al., 2011), and 3) as PSII monomers in a *psbJ* deletion mutant of *T. elongatus* (Zabert  
390 et al., 2021).

391 Two recent structures of PSII complexes with bound Psb27 (Zabert et al., 2021; Huang et  
392 al., 2021), confirmed the previously suggested (Liu et al., 2011; Komenda et al 2012) binding site  
393 for Psb27 close to the loop E in CP43. The structures also indicate that binding of Psb27 does not  
394 directly interfere with the binding of the extrinsic proteins, in agreement with the range of different  
395 Psb27-bound forms of PSII reported in the literature, and therefore reflecting the dynamic process  
396 of assembly and repair (Komenda et al., 2002; Roose and Pakrasi, 2004; Nowaczyk et al., 2006;  
397 Mamedov et al., 2007; Roose and Pakrasi, 2008; Grasse et al., 2011; Liu et al., 2011; Komenda et  
398 al., 2012; Avramov et al., 2020; Huang et al., 2021; Zabert et al., 2021). This agrees with the  
399 observation in the present work that in the PSII<sub>m</sub>-S/27, the Psb27 is bound, the extrinsic  
400 polypeptides are also bound, and the Mn<sub>4</sub>CaO<sub>5</sub> cluster is fully assembled in the majority (70%) of  
401 the centres. It is not clear if the PSII<sub>m</sub>-S/27 is an early-stage intermediate in the repair/assembly  
402 process, as suggested in Grasse *et al.* (2011) for a Mn-containing but inactive Psb27-bound PSII  
403 dimer in *T. elongatus* (Grasse et al., 2011), or a late stage intermediate, following photoassembly of  
404 Mn cluster, prior to joining the fully functional PSII population in the grana. However, the high  
405 activity seen in PSII<sub>m</sub>-S/27 when the centres were activated by bicarbonate, points to a lack of  
406 photodamage and favours its assignment as a late stage post-photoactivation intermediate.

407 The recent cryo-EM structure of the PSII monomer from *T. elongatus*, showing Psb27 bound  
408 to the CP43 and no Mn cluster, also showed significant modifications to the structure around the  
409 non-heme iron and the Q<sub>B</sub> site. The acceptor side modifications appear to be related to the binding  
410 of two other polypeptides, the Psb28 and the Psb34, that cause a conformational change of the D-E  
411 loop of the D1 protein that forms a stabilising interaction with Psb28. Part of the C-terminus of  
412 CP47 is also displaced by Psb34 forming a stabilising interaction with Psb28. Perhaps the most  
413 remarkable result of this conformational change was that the bicarbonate ligand to the non-heme  
414 iron was displaced by the carboxylic group of Glu241-D2 (Xiao et al., 2021; Zabert et al., 2021).

415 Kinetics of Q<sub>A</sub><sup>-</sup> oxidation measured for this complex (Zabert et al., 2021), and in other  
416 related complexes (Liu et al., 2011; Mamedov et al., 2011), all show large fractions of centres with  
417 slow Q<sub>A</sub><sup>-</sup> decay (greater than 10 s). This slow decay of Q<sub>A</sub><sup>-</sup> has been attributed to a situation in



418 which forward electron transfer is blocked and  $Q_A^{\bullet-}$  is trapped due to a stable electron donor to  
419 either  $Tyr_Z^{\bullet}$  or  $P_{D1}^+$ , such as a  $Mn^{2+}$  or a side-path donor (Nixon et al., 1992; Debus et al., 2000).  
420 This situation resembles that observed here in the fraction (~30%) of centres of PSII<sub>m</sub>-S/27 lacking  
421 the intact Mn cluster. This fraction could represent either centres that have yet to undergo  
422 photoactivation, similarly to the intermediates presented in Zabert *et al.* (2021), or centres that have  
423 lost the Mn-cluster during isolation from the thylakoid membrane.

424 Given the clear association of the Psb27 with the electron donor side in the cyanobacterial  
425 system, it is tempting to suggest that the plant Psb27 binds in a similar location and plays a similar  
426 role/s. It has been known for decades that changes on the electron donor side can have major effects  
427 on the electron acceptor side (Johnson et al., 1995). It is thus possible that the binding of the Psb27  
428 has a long-range effect on the electron acceptor side. Indeed, in the crystal structure of the PSII  
429 dimer with Psb27, the Psb27 binding site overlaps with the binding site of PsbQ in plants, and  
430 PsbQ' in red algae and diatoms (Huang et al., 2021). It has been reported that the PsbQ' binding to  
431 PSII shifts the reduction potential of the  $Q_A/Q_A^{\bullet-}$  couple to more positive values (Yamada et al.,  
432 2018). This suggests the possibility that the binding of Psb27 might result in a shift in the reduction  
433 potential of  $Q_A/Q_A^{\bullet-}$ .

434 There is much less relevant information for the PsbS, as there are no examples of isolated  
435 PSII cores with bound PsbS other than the PSII monomer studied here (Haniewicz *et al.*, 2013;  
436 Haniewicz *et al.*, 2015). Previous work on PsbS has been aimed at understanding its role, directly or  
437 indirectly associated with non-photochemical quenching (Niyogi and Truong, 2013; Ruban, 2016;  
438 Bassi and Dall'Osto, 2021). However, the PSII<sub>m</sub>-S/27 was isolated from plants that had not been  
439 subjected to light stress leading to the induction of non-photochemical quenching. Furthermore, the  
440 spectroscopic characterisation of PSII<sub>m</sub>-S/27 (Fig. 2 and 3) shows no quenching of the fluorescence  
441 due to PsbS binding. Therefore, a different functional role for PsbS in the PSII<sub>m</sub>-S/27 complex  
442 should be considered. Cross-linking experiments in thylakoid membranes upon induction of  
443 quenching, indicated that monomeric PsbS was associated with CP47 and D2, in addition to its  
444 expected association with LHClI (Correa-Galvis et al., 2016). The N-terminal and C-terminal  
445 loops, which are both on the stromal side of PsbS, could interact with the electron acceptor side of  
446 PSII and affect its function. In the absence of further structural information, it remains possible that  
447 the PsbS, in PSII<sub>m</sub>-S/27 is located as suggested in the cross-linking experiments (Correa-Galvis et  
448 al., 2016).

449 Now we turn to the effect of bicarbonate. Here, we found that the addition of bicarbonate  
450 activated PSII<sub>m</sub>-S/27 giving normal rates of  $Q_A^{\bullet-}$  oxidation (Fig. 4A and Table 2) and oxygen  
451 evolution (Table 1) and near normal TL (4D, Fig. S2). This unexpected bicarbonate-dependent  
452 activation showed that the PSII<sub>m</sub>-S/27 complex as isolated was essentially intact and capable of

453 normal function but was “switched off”. The study of the kinetics of  $Q_A^{\bullet-}$  oxidation as a function of  
454 the bicarbonate concentration showed a hyperbolic dependence, typical of the binding of a ligand to  
455 a discrete binding site and an apparent dissociation constant of  $\sim 600 \mu\text{M}$ . Brinkert *et al.* (2016)  
456 showed that the bicarbonate binding site on the non-heme Fe in functional granal PSII dimers has  
457 two binding affinities: a high affinity when  $Q_A$  is present and a lower affinity when long-lived  $Q_A^{\bullet-}$   
458 is present. Based on the thermodynamic relationship between the effect of bicarbonate binding and  
459 the reduction potential ( $E_m$ ) of  $Q_A/Q_A^{\bullet-}$ , and the literature  $Kd$  of  $80 \mu\text{M}$  (Stemler and Murphy, 1983)  
460 taken as the high affinity value, Brinkert *et al.* (2016) calculated the  $Kd$  for the low affinity state to  
461 be  $1.4 \text{ mM}$ . However, they pointed out that based on their observations, the literature  $Kd$  value,  $80$   
462  $\mu\text{M}$ , appeared to be overestimated and suggested that the actual value was in the low  $\mu\text{M}$  range, i.e.,  
463 that it had a significantly higher affinity. This would mean that the  $Kd$  for the low affinity  
464 conformation would be smaller than the  $1.4 \text{ mM}$ , and therefore close to, or smaller than the  $600 \mu\text{M}$   
465  $Kd$  measured here for bicarbonate activation of PSII<sub>m</sub>-S/27.

466 Brinkert *et al.* (2016) argued that the increase in the  $E_m$  of  $Q_A/Q_A^{\bullet-}$  that occurred upon the  
467 loss of the bicarbonate, would increase the energy gap between Pheo and  $Q_A$ , and this would  
468 disfavour the back-reaction route for charge recombination and favour direct charge recombination  
469 (Johnson et al, 1995). As described in the introduction, the back-reaction route via the pheophytin  
470 leads to chlorophyll triplet formation and thence to  $^1\text{O}_2$ -mediated photodamage, while the direct  
471 recombination of the slower  $P^+Q_A^{\bullet-}$  radical pair is considered safe (Rutherford et al., 1982; Johnson  
472 et al., 1995). The bicarbonate-mediated redox tuning of  $Q_A$  was thus considered to be a regulatory  
473 and protective mechanism (Brinkert et al., 2016). It seems quite likely that a similar protective  
474 mechanism exists in the PSII<sub>m</sub>-S/27, as protection is needed during and after synthesis or repair.

475 The increased stability of the PSII<sub>m</sub>-S/27 conferred by the presence of PsbS and/or Psb27  
476 was manifest by its resilience to long incubations and photochemical measurements at room  
477 temperature. This resilience contrasted with the fragility of the PSII<sub>m</sub>, which could not be studied  
478 even for short periods at room temperature without loss of activity.

479 A bicarbonate-controlled, redox-tuning-based, protective mechanism in PSII<sub>m</sub>-S/27 would  
480 appear to be beneficial for this complex. A non-functional PSII, like PSII<sub>m</sub>-S/27 with an intact  
481 electron donor-side but with inhibited forward electron transfer and a low-potential  $Q_A$  (Johnson et  
482 al., 1995), would be hypersensitive to backreaction-associated photodamage, just as occurs in  
483 herbicide-treated PSII (Rutherford and Krieger-Liszskay, 2001). It is known that before  
484 photoactivation of water oxidation in PSII, the  $E_m$  of  $Q_A/Q_A^{\bullet-}$  is high and thus PSII is photo-  
485 protected, and at some point during the photoassembly of the Mn complex, the  $E_m$  is shifted to a  
486 functional, low potential value (Johnson et al., 1995). If the PSII<sub>m</sub>-S/27 is a late-stage intermediate  
487 of photoactivation, then the present work would indicate that the donor-side-induced switching of



488 the  $E_m$  of  $Q_A/Q_A^{\bullet-}$  is overridden by modifications to the acceptor side that maintain  $Q_A$  in a safe,  
489 high-potential form, until the fully assembled PSII is delivered into the granal stack and is  
490 dimerised. The binding of the PsbS and Psb27, can be considered as exerting conformation  
491 restrictions to the assembled but non-functional PSII, protecting it until it is in the right place and  
492 dimerised. At that point, presumably the PsbS and Psb27 dissociate, allowing the PSII to adopt its  
493 functional conformation, allowing the high affinity bicarbonate site to form. The bicarbonate duly  
494 binds, shifting the  $E_m$  of  $Q_A/Q_A^{\bullet-}$  to low potential and allowing optimal function. When considering  
495 the measured dissociation constant for bicarbonate in PSII<sub>m</sub>-S/27 (600  $\mu$ M), it seems clear that the  
496 physiological concentration of  $CO_2$  could control, to some extent, the activity of this complex. At  
497 pH 8.0 the equilibrium concentration of bicarbonate will be sufficiently high to allow more than  
498 50% of this complex to show normal forward electron transfer kinetics.

499 Another less likely explanation for the lower activity of PSII<sub>m</sub>-S/27 is that it represents an  
500 early-stage intermediate in the repair cycle. In this model, photodamage would be manifest as an  
501 electron acceptor side restriction, and the binding of Psb27 and PsbS and the higher potential form  
502 of  $Q_A$ , due to the loss of bicarbonate, would protect the system from photodamage during its transit  
503 to the repair site in the stromal lamellae.

504 In the literature there are several examples of other PSII subunits which seem to exhibit  
505 similar or related effects to those described here for PsbS and Psb27, though none of them are as  
506 marked as observed in this work. These are listed in the supplementary information (See SI  
507 Appendix). This evidence in the literature and the present work point to a broader picture in which  
508 there is an interplay between the binding of small subunits to PSII with the resulting conformational  
509 effects, and the binding of bicarbonate with the resulting redox tuning effects. This interplay  
510 appears to control electron transfer rates and thermodynamic equilibria between the different  
511 quinones in all their forms, thereby regulating and safeguarding PSII during the diverse steps of its  
512 life cycle.

513

## 514 **Conclusions**

515 We show that the PSII monomer from the stromal lamellae/stromal margins, which has PsbS and  
516 Psb27 bound to it, has very low activity but is activated upon binding bicarbonate. These findings  
517 indicate that PSII<sub>m</sub>-S/27 is a switched-off state that is protected from photodamage presumably due  
518 to the changes induced by the binding of the two extra polypeptides. The nature of the protection  
519 mechanism appears to be complex, not least because of sample heterogeneity, but the dominant one  
520 in the PSII<sub>m</sub>-S/27 sample appears to involve a modification of the  $Q_B$  site, affecting its proton-  
521 coupled electron transfer properties and its exchange with the PQ pool. Another important feature of  
522 this complex is the diminished affinity for bicarbonate and the significant positive redox shift of the

523  $Q_A/Q_A^{\bullet-}$  reduction potential that appears to be present when the bicarbonate is not bound. Just such  
524 a shift occurs in standard granal PSII dimers when bicarbonate is released upon  $Q_A^{\bullet-}$  accumulation  
525 (Brinkert et al., 2016). The redox shift protects against the well-characterised photodamage arising  
526 from chlorophyll triplet-mediated, singlet-oxygen generation (Johnson et al., 1995). This kind of  
527 protection is expected to be important in a near-intact PSII that is switched-off in transit, either after  
528 photoactivation or prior to repair.

529

## 530 **Material and Methods**

### 531 **Growth and cultivation of tobacco plants**

532 Transplastomic plants of *Nicotiana tabacum*, which have a hexa-histidine tag sequence at the 5' end  
533 of the gene coding for the PsbE subunit were used for this work (Fey et al., 2008). Plants were kept  
534 at a constant temperature of 25°C, at 50% relative humidity, and grown for 10–12 weeks under a  
535 light regime of 12 h/day, with a light intensity of 150–200  $\mu\text{mol photons s}^{-1} \text{m}^{-2}$ .

536

### 537 **Thylakoids preparation and PSII core solubilizations**

538 Thylakoid membranes and PSII cores were prepared as previously reported (Haniewicz *et al.*, 2013;  
539 Haniewicz *et al.*, 2015), with only minimal modifications in the solubilization step. Briefly, PSII  
540 core complexes retaining the subunits PsbS and Psb27 were obtained from thylakoid membranes  
541 solubilized for 5 min at 4°C at a final chlorophyll concentration of 3 mg/mL. After solubilization,  
542 the unsolubilized fraction was separated by centrifugation at 35000 g for 10 min at 4°C. The  
543 unsolubilized fraction underwent a second solubilization step to isolate the PSII core complexes  
544 lacking PsbS and Psb27. This second solubilization took place for 15 min at 4°C at a final  
545 chlorophyll concentration of 1 mg/mL. Also, after this second solubilization, the unsolubilized  
546 fraction was separated by centrifugation at 35000 g for 10 min at 4°C. In both cases, the  
547 solubilization was carried out in the dark, adjusting the chlorophyll concentration with Grinding  
548 buffer (20 mM MES–NaOH, pH 6.5, 5 mM  $\text{MgCl}_2$ ) and using 20 mM (1.02 %) n-Dodecyl-  $\beta$ -D-  
549 maltoside ( $\beta$ -DDM).

550

### 551 **PSII core complexes isolation**

552 Photosystem II samples were prepared using Ni-affinity chromatography and a subsequent step of  
553 size exclusion chromatography as reported in Haniewicz *et al.* (2013) for PSII complexes retaining  
554 the subunit PsbS, and according to Haniewicz *et al.* (2015) for PSII complex lacking the subunit  
555 PsbS. For the size exclusion chromatography step, buffer containing 20 mM MES–NaOH, pH 6.5, 5

556 mM MgCl<sub>2</sub> and with 0.02% (~0.39 mM) β-DDM (buffer A). Previously a slightly higher detergent  
557 content was used of 0.03% (~ 0.59 mM) (Haniewicz *et al.*, 2013; Haniewicz *et al.*, 2015). In these  
558 studies, all chromatography columns were subjected to the ReGenFix procedure  
559 (<https://www.regenfix.eu/>) for regeneration and calibration prior use.

560

### 561 **Polyacrylamide gel electrophoresis**

562 Denaturing Sodium Dodecyl Sulphate-Polyacrylamide Gel Electrophoresis (SDS-PAGE) consisted  
563 in 10% (w/v) separating polyacrylamide/urea gels with 4% (w/v) stacking gels (Piano *et al.*, 2010;  
564 Collu *et al.*, 2017). Samples were denatured with Rotiload (Roth) at room temperature before  
565 loading, and, after electrophoresis gels were stained with Coomassie brilliant blue G250.

566

### 567 **Absorption, CD spectroscopy and chlorophyll determination**

568 The protein content of thylakoids was assessed through three independent measurements based on  
569 the concentrations of Chl *a* and Chl *b*. The absorption of chlorophylls extracted in 80% (v/v)  
570 acetone, in a dilution factor of 200 or 500, was measured with a Pharmacia Biotech Ultrospec 4000  
571 spectrophotometer, and their relative concentrations were calculated according to Porra *et al.*  
572 (1989). CD spectra were the average of three accumulations recorded at a sensitivity of 100 mdeg  
573 and a scan speed of 100 nm/min using a CD spectrometer JASCO J-810. Absorption and CD  
574 spectra were recorded at room temperature in the range of 370-750 nm, with an optical path length  
575 of 1 cm and a band-pass of 2 nm. Spectra were recorded on an absorption Ultra Micro quartz cell  
576 with 10 mm light path (Hellma Analytics). In all cases, measurements were performed in a range  
577 between 0.01 and 0.2 mg/mL Chls, and samples were diluted in buffer A.

578

### 579 **Fluorescence spectroscopy and kinetics**

580 Emission and excitation spectra were recorded on a Jasco FP-8200 spectrofluorometer at 4°C in 0.1  
581 nm steps and 3 nm band-pass. Spectra were corrected for the photomultiplier sensitivity using a  
582 calibrated lamp spectrum. Emission spectra in the range of 600-750 nm were recorded using the  
583 main absorption bands as excitation wavelength (437 nm in Fig 2). Fluorescence spectra were  
584 recorded on a fluorescence Ultra Micro quartz cell with 3 mm light path (Hellma Analytics). The  
585 flash-induced increase and the subsequent decay of chlorophyll fluorescence yield and the values of  
586 F<sub>0</sub>, F<sub>m</sub> and F<sub>v</sub> were measured with a fast double modulation fluorimeter (FL 3000, PSI, Czech  
587 Republic). The sample concentration was 5 µg Chl/ml in buffer A. Samples were subjected to a pre-  
588 illumination in room light for 10 seconds followed by a period of 5 to 10 minutes of dark  
589 adaptation.

590 Multicomponent deconvolution of the measured curves was done by using a fitting function with  
591 three components based on the widely used model of the two-electron gate (Croft and Wraight,  
592 1983; Vass et al., 1999). The fast and middle phases were simulated with exponential components.  
593 However, slow recombination of  $Q_A^{\bullet-}$  via charge recombination has been shown to obey hyperbolic  
594 kinetics corresponding to an apparently second order process (Bennoun, 1994), most probably the  
595 result of stretched exponentials indicative of inhomogeneity in this time-range. Therefore, the data  
596 were fitted with a linear combination of two exponentials and a hyperbolic component, where  $F(t)$  is  
597 the variable fluorescence yield,  $F_0$  is the basic fluorescence level before the flash,  $A_1$ – $A_3$  are the  
598 amplitudes,  $T_1$ – $T_3$  are the time-constants, from which the half-lives were calculated via  $t_{(1/2)} = \ln 2 \cdot T$   
599 for the exponential components, and  $t_{(1/2)}$  is the  $T$  for the hyperbolic component.

600

$$601 \quad F(t) - F_0 = A_1 \exp(-t/T_1) + A_2 \exp(-t/T_2) + A_3 / (1 + t/T_3) \quad \text{Eq.1}$$

602

603 When the herbicide 3-(3,4-dichlorophenyl)-1,1-dimethylurea (DCMU) was added, 10  $\mu$ M of an  
604 ethanolic solution were added in the dark to 1 mL of protein solution in buffer A, prior to the 5  
605 minutes dark adaptation step.

606 The kinetics measured as a function of increasing concentrations of bicarbonate (0.5, 1, 5, 10 mM)  
607 were fitted with a hyperbolic curve (Eq. 2) from which the apparent dissociation constant ( $K_{d \text{ app}}$ )  
608 was calculated.

609

$$610 \quad \Delta \text{Fluorescence at } 0.2s = f_{\text{max}} / (K_{d \text{ app}} + [\text{bicarbonate}]) \quad \text{Eq2}$$

611

612 where  $\Delta$ Fluorescence at 0.2 s is the difference in fluorescence value at 0.2 s subtracted of the value  
613 before any addition of bicarbonate, and  $f_{\text{max}}$  is the fluorescence difference value when the binding  
614 site is fully occupied. The pH was monitored upon addition of bicarbonate to make sure that no  
615 shifts in pH occurred.

616

### 617 **Oxygen evolution**

618 The oxygen evolution was measured with a Clark-type electrode (Hansatech, England) at 20°C,  
619 with 1 mM 2,6-dichloro-p-benzoquinone and 1 mM ferricyanide as electron acceptors in the  
620 reaction mixture. Measurements were carried on samples with a chlorophyll concentration of 1  
621 mg/mL diluted 20 times in buffer A to a final concentration of 50  $\mu$ g Chl/mL. Three independent  
622 measurements were done on the same preparation to test the activity. Reactions were started with  
623 illumination from a white light source (400-700 nm) with a Photosynthetically Active Photon Flux  
624 Density (PPFD) of 700-800  $\mu$ moles of photons  $\text{m}^{-2} \text{s}^{-1}$ . For the effect of bicarbonate on PSII<sub>m</sub>-S/27

625 samples, 5 mM NaHCO<sub>3</sub> was added to the reaction mixture.

626

### 627 **Thermoluminescence**

628 Thermoluminescence (TL) was measured with a lab-built apparatus, essentially as described in  
629 (Ducruet and Vass, 2009) but using a GaAsP photomultiplier H10769A-50 (Hamamatsu). Samples  
630 were pre-illuminated with room light ( $\sim 20 \mu\text{mol m}^{-2} \text{s}^{-1}$ ) for 10 s, dark-adapted for 5 to 10 min and  
631 then cooled to 5°C. After 2 min, samples were excited with a single turnover saturating flash.  
632 Finally, samples were rapidly cooled to -15°C and luminescence was recorded with a 20°C min<sup>-1</sup>  
633 heating rate. The sample concentration was 5 µg Chl/ml in buffer A.

634

### 635 **Acknowledgments**

636 This work was carried out with the support of the program Homing Plus (Foundation for Polish  
637 Science) grant No: 2012-6/10 co-financed by the European Union under the European Regional  
638 Development Funds (to D.P.), the PRELUDIUM programme (National Science Centre) grant  
639 number DEC-2012/05/05/N/NZ1/01922 (to P.H.), Biotechnology and Biological Sciences Research  
640 Council (BBSRC) Grants BB/K002627/1 and BB/R00921X (to A.W.R.). We thank J-M Ducruet  
641 for help with setting up the thermoluminescence.

642 **Author contributions:** A.F., A.W.R., D.P., and C.B. designed research; A.F., K.P., D.P., P.H., and  
643 D.F. performed research; D.P. and D.F. contributed new reagents/analytic tools; A.F., K.P.,  
644 A.W.R., C.B., M.B., and D.P. analyzed data; A.F. A.W.R., D.P., P.H., D.F., C.B., M.B., and M.C.L.  
645 wrote the paper.

646

647 **Tables**

648

649 **Table 1:** Rates of oxygen evolution for PSII<sub>m</sub> and PSII<sub>m</sub>-S/27 with or without added bicarbonate.

650 Data represent mean +/- SD, n = 3.

| PSII type               | Added [NaHCO <sub>3</sub> ] | Oxygen evolution rates (μmol O <sub>2</sub> / mg Chls·h) |
|-------------------------|-----------------------------|----------------------------------------------------------|
| PSII <sub>m</sub>       | 0                           | 1030 ± 13                                                |
| PSII <sub>m</sub> -S/27 | 0                           | 52 ± 5                                                   |
|                         | 5 mM                        | 795 ± 8                                                  |

651

652 **Table 2:** Kinetic parameters of flash-induced chlorophyll fluorescence decay in PSII<sub>m</sub>, PSII<sub>m</sub>-S/27

653 samples in absence or presence of additional bicarbonate in solution. The values of the kinetic half-

654 lives (t) and the amplitudes of each phase are compared to the literature values for PSII monomer

655 from *T. elongatus* (Zimmermann et al., 2006)(\*). Data represent mean +/- SD, n = 3.

| PSII type               | Added NaHCO <sub>3</sub> [mM] | T °C | Fast phase |         | Middle phase |         | Slow phase |         |
|-------------------------|-------------------------------|------|------------|---------|--------------|---------|------------|---------|
|                         |                               |      | t (ms)     | Amp (%) | t (ms)       | Amp (%) | t (s)      | Amp (%) |
| PSII <sub>m</sub>       | 0                             | 15   | 1.9 ± 0.3  | 31 ± 2  | 85 ± 10      | 18 ± 3  | 23 ± 4     | 51 ± 1  |
| PSII <sub>m</sub> -S/27 | 0                             | 15   | 17 ± 3     | 7 ± 3   | 770 ± 40     | 25 ± 3  | 180 ± 35   | 68 ± 2  |
|                         | 0                             | 20   | 67 ± 10    | 21 ± 4  | 982 ± 130    | 34 ± 2  | 41 ± 5     | 45 ± 3  |
|                         | 5                             | 20   | 3 ± 0.5    | 27 ± 2  | 115 ± 21     | 25 ± 2  | 13 ± 2     | 48 ± 2  |
| PSII monomer(*)         | 0                             | 20   | 3.7 ± 0.5  | 30 ± 7  | 37 ± 15      | 11 ± 2  | 9.9 ± 0.7  | 59 ± 5  |

656

657

658

659

660

661

662 **Figure Legends**

663

664 **Figure 1:** The location within the thylakoid membrane of the protein complexes investigated in this

665 work. PSII<sub>m</sub>-S/27 is in the lamella membranes (red inset) and suggested to be an intermediate in the

666 assembly and repair pathway, probably after photoactivation. This complex migrates (as indicated

667 by the black arrows) to the grana membranes (blue inset) where upon dissociation of PsbS and

668 Psb27, it forms the active monomer, PSII<sub>m</sub>. The PSII<sub>m</sub> will then form active dimers and bind

669 antenna proteins to form fully functional complexes.

670



671 **Figure 2:** Comparisons of the PSII<sub>m</sub> and PSII<sub>m</sub>-S/27. A) Coomassie Blue Stained SDS-PAGE of  
672 the PSII<sub>m</sub> (A) and PSII<sub>m</sub>-S/27 (B). The additional presence of a ~ 22 kDa (PsbS) and a ~ 14 kDa  
673 (Psb27) bands in the PSII<sub>m</sub>-S/27 sample are indicated together with the main PSII subunits. The  
674 lanes labelled as M indicate the molecular weight markers. B) UV-Vis absorption spectra of PSII<sub>m</sub>  
675 (black line) and PSII<sub>m</sub>-S/27 (red line). Spectra were taken at 20°C in buffer A and were normalized  
676 at 675 nm. C) Fluorescence emission spectra of PSII<sub>m</sub> (black line) and PSII<sub>m</sub>-S/27 (red line).  
677 Spectra, recorded at 4°C in buffer A with excitation at 437 nm. D) Circular dichroism spectra at  
678 20°C in buffer A of PSII<sub>m</sub>-S/27 (red line) and PSII<sub>m</sub> (black line).

679

680 **Figure 3:** A) Fluorescence relaxation kinetics data presented without normalization to show the  
681 values of  $F_0$  and  $F_m$  for PSII<sub>m</sub> (squares symbols, black line) and PSII<sub>m</sub>-S/27 (circles symbols, red  
682 line). Both  $F_0$  and  $F_m$  were found to be higher in the sample with bound PsbS and Psb27. B)  
683 Fluorescence relaxation kinetics of PSII<sub>m</sub> (squares, black line) and PSII<sub>m</sub>-S/27 (circles, red line),  
684 measured at 15°C in buffer A. Data were normalized using the initial amplitudes. Fittings were  
685 carried out with equation 1 (see methods). C) Thermoluminescence measurements for PSII<sub>m</sub> (black  
686 squares and line) and PSII<sub>m</sub>-S/27 (red circles and line), in buffer A. Single saturating flash was  
687 given at 5°C followed by rapid cooling to -5°C. Scan rate was 0.5°C/s. D) Fluorescence relaxation  
688 kinetics upon a single saturating flash for the PSII<sub>m</sub> (squares, black line) and PSII<sub>m</sub>-S/27 (circles,  
689 red line), measured at 15°C in buffer A in the presence of 10 μM DCMU. Data were normalized  
690 using the initial amplitudes. Fittings were carried out with equation 1 (see methods).

691

692 **Figure 4:** A) Fluorescence relaxation kinetics for PSII<sub>m</sub>-S/27, measured at 20 °C in buffer A,  
693 without (circles symbols, red line) and with (triangles symbols, blue line) added 5 mM bicarbonate.  
694 Data were normalized using the initial amplitudes. Fittings were carried out with equation 1 (see  
695 methods). Error bars represent the standard errors calculated from 4 independent measurements. B)  
696 Fluorescence relaxation kinetics for PSII<sub>m</sub>-S/27, measured at 20 °C in buffer A and 10 μM DCMU,  
697 without (circles symbols, red line) and with (triangles symbols, blue line) added 5 mM bicarbonate.  
698 Data were normalized using the initial amplitudes. Fittings were carried out with equation 1 (see  
699 methods). Error bars represent the standard errors calculated from 4 independent measurements. C)  
700 Plot of the fluorescence intensity at 0.2 s (triangles symbols) from the fluorescence relaxation  
701 kinetics, at 20 °C in buffer A, from different samples to which increasing concentrations of  
702 bicarbonate were added. The data were fitted with the hyperbole in equation 2 (see methods) (blue  
703 line). Error bars represent the standard errors calculated from 4 independent measurements; D)  
704 Thermoluminescence measurements of PSII<sub>m</sub>-S/27 in buffer A, in the absence (red circles) and



705 presence (blue triangles) of added 5 mM bicarbonate. Single saturating flash was given at 5 °C  
706 followed by rapid cooling to -5 °C. Scan rate was 0.5 °C/s.

707

## 708 **References**

709

710 **Albertsson P-A** (2001) A quantitative model of the domain structure of the photosynthetic  
711 membrane. *Trends in Plant Sci.* **6**: 349-354

712 **Alfonso M, Montoya G, Cases R, Rodríguez R, Picorel R** (1994) Core antenna complexes, CP43  
713 and CP47, of higher plant photosystem II. Spectral properties, pigment stoichiometry, and amino  
714 acid composition. *Biochem.* **33**: 10494-10500

715 **Andersson B, Anderson J-M** (1980) Lateral heterogeneity in the distribution of chlorophyll-  
716 protein complexes of the thylakoid membranes of spinach chloroplasts. *Biochim. Biophys. Acta*  
717 **593**: 427-440

718 **Avramov AP, Hwang HJ, Burnap RL** (2020) The role of Ca<sup>2+</sup> and protein scaffolding in the  
719 formation of nature's water oxidizing complex. *Proc. Natl. Ac. Sci. USA* **117**: 28036-28045

720 **Bassi R, Dall'Osto L** (2021) Dissipation of light energy absorbed in excess: the molecular  
721 mechanisms. *Annu. Rev. Plant Biol.* **72**: 47-76

722 **Bennoun P** (1994) Chlororespiration revisited: Mitochondrial-plastid interactions in  
723 *Chlamydomonas*. *Biochim. Biophys. Acta* **1186**: 59-66

724 **Bergantino E, Segalla A, Brunetta A, Teardo E, Rigoni F, Giacometti GM, Szabò I** (2003)  
725 Light- and pH-dependent structural changes in the PsbS subunit of photosystem II. *Proc. Natl.*  
726 *Acad. Sci. USA* **100**: 15265–15270

727 **Brinkert K, De Causmaecker S, Krieger-Liszkay A, Fantuzzi A, Rutherford AW** (2016)  
728 Bicarbonate-induced redox tuning in Photosystem II for regulation and protection. *Proc. Natl. Acad.*  
729 *Sci. U S A.* **113**: 12144-12149

730 **Caffarri S, Kouril R, Kereïche S, Boekema EJ, Croce R** (2009) Functional architecture of higher  
731 plant photosystem II supercomplexes. *EMBO J.* **28**: 3052-3063

732 **Chen H, Zhang D, Guo J, Wu H, Jin M, Lu Q, Lu C, Zhang L** (2006) A Psb27 homologue in  
733 *Arabidopsis thaliana* is required for efficient repair of photodamaged photosystem II. *Plant Mol.*  
734 *Biol.* **61**: 567-575

735 **Collu G, Farci D, Esposito F, Pintus F, Kirkpatrick J, Piano D** (2017) New insights into the  
736 operative network of FaEO, an enone oxidoreductase from *Fragaria x ananassa* Duch. *Plant Mol.*  
737 *Biol.* **94**:125-136

738 **Correa-Galvis V, Poschmann G, Melzer M, Stühler K, Jahns P**(2016) PsbS interactions  
739 involved in the activation of energy dissipation in *Arabidopsis*. *Nat. Plants.* **2**: 15225

- 740 **Crofts AR, Wraight CA** (1983) The electrochemical domain of photosynthesis. *Biochim. Biophys.*  
741 *Acta* **726**: 149–185
- 742 **Dall'Osto L, Cazzaniga S, Bressan M, Paleček D, Židek K, Niyogi KK, Fleming GR,**  
743 **Zigmantas D, Bassi R** (2017) Two mechanisms for dissipation of excess light in monomeric and  
744 trimeric light-harvesting complexes. *Nat. Plants.* **3**:17033
- 745 **Danielsson R, Suorsa M, Paakkarinen V, Albertsson P-A, Styring S, Aro E-M, Mamedov F**  
746 (2006) Dimeric and monomeric organization of photosystem II. *J. Biol. Chem.* **281**: 14241–14249
- 747 **Dau H, Zaharieva I** (2009) Principles, efficiency, and blueprint character of solar-energy  
748 conversion in photosynthetic water oxidation. *Acc Chem Res.* **42**: 1861-1870
- 749 **De Causmaecker S, Douglass JS, Fantuzzi A, Nitschke N, Rutherford AW** (2019) Energetics of  
750 the exchangeable quinone, Q<sub>B</sub>, in Photosystem II. *Proc. Natl. Acad. Sci.* **116**: 9458-9463
- 751 **Debus RJ, Campbell KA, Pham DP, Hays A-MA, Britt RD** (2000). Glutamine 189 of the D1  
752 polypeptide modulates the magnetic and redox properties of the manganese cluster and tyrosine Yz  
753 in Photosystem II. *Biochem.* **39**: 6275-6287
- 754 **Dietzel L, Bräutigam K, Steiner S, Schöffler K, Lepetit B, Grimm B, Schöttler MA,**  
755 **Pfannschmidt T** (2011) Photosystem II supercomplex remodelling serves as an entry mechanism  
756 for state transitions in *Arabidopsis*. *Plant Cell.* **23**: 2964-2977
- 757 **Ducruet J, Vass I** (2009) Thermoluminescence: experimental. *Photosynth. Res.* **101**: 195–204
- 758 **Fan M, Li M, Liu Z, Cao P, Pan X, Zhang H, Zhao X, Zhang J, Chang W** (2015) Crystal  
759 structures of the PsbS protein essential for photoprotection in plants. *Nat. Struct. Mol. Biol.* **22**:  
760 729-735
- 761 **Fey H, Piano D, Horn R, Fischer D, Schmidt M, Ruf S, Schröder WP, Bock R, Büchel C**  
762 (2015) Isolation of highly active photosystem II core complexes with a His-tagged Cyt *b*<sub>559</sub> subunit  
763 from transplastomic tobacco plants. *Biochim. Biophys. Acta* **1777**: 1501–1509
- 764 **Gachek DA, Holleboom CP, Tietz S, Kirchhoff H, Walla PJ** (2019) PsbS-dependent and -  
765 independent mechanisms regulate carotenoid-chlorophyll energy coupling in grana thylakoids.  
766 *FEBS Lett.* **593**: 3190-3197
- 767 **Grasse N, Mamedov F, Becker K, Styring S, Rögner M, Nowaczyk MM** (2011) Role of novel  
768 dimeric Photosystem II (PSII)-Psb27 protein complex in PSII repair. *J. of Biol. Chem.* **286**: 29548-  
769 29555
- 770 **Haniewicz P, De Sanctis D, Büchel C, Schröder W P, Loi M C, Kieselbach T, Bochtler M,**  
771 **Piano D** (2013) Isolation of monomeric photosystem II that retains the subunit PsbS. *Photosynth*  
772 *Res.* **118**: 199-207
- 773 **Haniewicz P, Floris D, Farci D, Kirkpatrick J, Loi MC, Büchel C, Bochtler M, Piano D** (2008)  
774 Isolation of Plant Photosystem II Complexes by Fractional Solubilization. *Front. Plant Sci.* **6**:1100

- 775 **Huang G, Xiao Y, Pi X, Zhao L, Zhu Q, Wang W, Kuang T, Han G, Sui SF, Shen JR** (2021)  
776 Structural Insights into a dimeric Psb27-photosystem II complex from a cyanobacterium  
777 *Thermosynechococcus vulcanus*. Proc. Natl. Acc. Sci. USA **118**: e2018053118
- 778 **Johnson GN, Rutherford AW, Krieger A** (1995) A change in the midpoint potential of the quinone  
779 Q(A) in Photosystem II associated with photoactivation of oxygen evolution. Biochim. Biophys.  
780 Acta. **1229**: 202-207
- 781 **Johnson M P** (2016) Photosynthesis. Essays Biochem. **60**: 255–273
- 782 **Kirchhoff H** (2019) Chloroplast ultrastructure in plants. New Phytologist **223**: 565-574
- 783 **Komenda J, Lupinkova L, Kopecky J** (2002) Absence of the psbH gene product destabilizes  
784 Photosystem II complex and bicarbonate binding on its acceptor side in *Synechocystis* PCC 6803.  
785 Eur. J. Biochem. **269**: 610-619
- 786 **Komenda J, Sobotka R, Nixon PJ** (2012) Assembling and maintaining the Photosystem II  
787 complex in chloroplasts and cyanobacteria. Curr. Op. in Plant Biol. **15**: 245-251
- 788 **Krausz E, Hughes JL, Smith P, Pace R, Årsköld SP** (2005) Oxygen-evolving Photosystem II  
789 core complexes: a new paradigm based on the spectral identification of the charge-separating state,  
790 the primary acceptor and assignment of low-temperature fluorescence. Photochem. Photobiol. Sci.  
791 **4**: 744-753
- 792 **Krieger-Liszkay A** (2005) Singlet oxygen production in photosynthesis. J. of Exp. Bot. **56**: 337–  
793 346
- 794 **Lavergne J, Leci E** (1993) Properties of inactive Photosystem II centres. Photosynth. Res. **35**: 323-  
795 343
- 796 **Li XP, Gilmore AM, Caffarri S, Bassi R, Golan T, Kramer D, Niyogi KK** (2004) Regulation of  
797 photosynthetic light harvesting involves intrathylakoid lumen pH sensing by the PsbS protein. J  
798 Biol Chem. **279**: 22866-22874
- 799 **Liguori N, Campos SRR, Baptista AM, Croce R** (2019) Molecular Anatomy of Plant  
800 Photoprotective Switches: The Sensitivity of PsbS to the Environment, Residue by Residue. J Phys.  
801 Chem. Lett. **10**:1737-1742
- 802 **Liu H, Roose JL, Cameron JC, Pakrasi HB** (2011) A genetically tagged Psb27 protein allows  
803 purification of two consecutive Photosystem II (PSII) assembly intermediates in *Synechocystis*  
804 6803, a cyanobacterium. J. of Biol. Chem. **286**: 24865-24871
- 805 **Ljungberg U, Åkerlund HE, Larsson C, Andersson B** (1984) Identification of polypeptides  
806 associated with the 23 and 33 kDa proteins of photosynthetic oxygen evolution. Biochim. Biophys.  
807 Acta. **767**: 145-152
- 808 **Mamedov F, Nowaczyk MM, Thapper A, Rogner M, Styring S** (2007) Functional  
809 characterization of monomeric Photosystem II core preparations from *Thermosynechococcus*

- 810 *elongatus* with or without the Psb27 protein. *Biochem.* **46**: 5542-5551
- 811 **Melis A** (1985) Functional properties of Photosystem II<sub>β</sub> in spinach chloroplasts. *Biochim Biophys*  
812 *Acta.* **808**: 334-342
- 813 **Nickelsen J, Rengstl B** (2013) Photosystem II assembly: from cyanobacteria to plants. *Annu. Rev.*  
814 *Plant Biol.* **64**: 609-635
- 815 **Nixon PN, Trost JT, Diner BA** (1992) Role of carboxyl terminus of polypeptide D1 in the  
816 assembly of a functional water-oxidizing manganese cluster in Photosystem II of the  
817 cyanobacterium *Synechocystis* sp. PCC 6803: assembly requires a free carboxyl group at C-terminal  
818 position 344. *Biochem.* **31**:10859-10871
- 819 **Niyogi KK, Truong TB** (2013) Evolution of flexible non-photochemical quenching mechanisms  
820 that regulate light harvesting in oxygenic photosynthesis. *Curr. Op. Plant Biol.* **16**: 307-314
- 821 **Nowaczyk MM, Hebel R, Schlodder E, Meyer HE, Warscheid B, Rögner M** (2006) Psb27, a  
822 cyanobacterial lipoprotein, is involved in the repair cycle of photosystem II. *Plant Cell.* **18**: 3121-  
823 3131
- 824 **Piano D, El Alaoui S, Korza HJ, Filipek R, Sabala I, Haniewicz P, Buechel C, De Sanctis D,**  
825 **Bochtler M** (2010) Crystallization of the photosystem II core complex and its chlorophyll binding  
826 subunit CP43 from transplastomic plants of *Nicotiana tabacum*. *Photosynth. Res.* **106**: 221–226
- 827 **Porra RJ, Thompson WA, Kriedmann PE** (1989) Determination of accurate extinction  
828 coefficients and simultaneous equations for assaying chlorophylls *a* and *b* with four different  
829 solvents: verifications of the concentration of chlorophyll standards by atomic absorption  
830 spectroscopy. *Biochim. Biophys. Acta* **975**: 384–394
- 831 **Pospíšil P** (2016) Production of Reactive Oxygen Species by Photosystem II as a Response to Light  
832 and Temperature Stress. *Front Plant Sci.* **7**: 1950
- 833 **Puthiyaveetil S, Tsabari O, Lowry T, Lenhart S, Lewis RR, Reich Z, Kirchhoff H** (2014)  
834 Compartmentalization of the protein repair machinery in photosynthetic membrane. *Proc. Natl.*  
835 *Acad. Sci. USA* **111**: 15839-15844
- 836 **Roach T, Krieger-Liszkay A** (2012) The role of the PsbS protein in the protection of photosystems  
837 I and II against high light in *Arabidopsis thaliana*. *Biochim. Biophys. Acta.* **1817**: 2158-2165
- 838 **Roose JL, Pakrasi HB** (2004) Evidence that D1 processing is required for manganese binding and  
839 extrinsic protein assembly into Photosystem II. *J. Biol. Chem.* **279**: 45417-45422
- 840 **Roose JL, Pakrasi HB** (2008) The Psb27 protein facilitates manganese cluster assembly in  
841 photosystem II. *J. Biol. Chem.* **283**: 4044-4050
- 842 **Ruban A V, Johnson M P** (2015) Visualizing the dynamic structure of the plant photosynthetic  
843 membrane. *Nat. Plants* **1**: 15161
- 844 **Ruban AV** (2016) Nonphotochemical chlorophyll fluorescence quenching: mechanism and

- 845 effectiveness in protecting plants from photodamage. *Plant Physiol.* **170**: 1903-1916
- 846 **Rutherford AW, Crofts AR, Inoue Y** (1982) Thermoluminescence as a probe of Photosystem II  
847 photochemistry: the origin of the flash induced glow peaks. *Biochim. Biophys. Acta* **682**: 457-465.
- 848 **Rutherford AW, Krieger-Liszkay A** (2001) Herbicide-induced oxidative stress in Photosystem II.  
849 *Trends In Biochem. Sc.* **26**: 648–653
- 850 **Rutherford AW, Osyczka A, Rappaport F** (2012) Back-reactions, short-circuits, leaks and other  
851 energy wasteful reactions in biological electron transfer: Redox tuning to survive life in O<sub>2</sub>. *FEBS*  
852 *Lett.* **586**: 603–616
- 853 **Rutherford AW, Paterson DR, Mullet JE** (1981) A light-induced spin-polarized triplet detected by  
854 EPR in Photosystem II reaction centers. *Biochim. Biophys. Acta* **635**: 205–214
- 855 **Sacharz J, Giovagnetti V, Ungerer P, Mastroianni G, Ruban AV** (2017) The xanthophyll cycle  
856 affect reversible interactions between PsbS and light-harvesting complex II to control non-  
857 photochemical quenching. *Nat. Plant.* **3**: 16225
- 858 **Shevela D, Eaton-Rye JJ, Shen JR, Govindjee** (2012) Photosystem II and the unique role of  
859 bicarbonate: a historical perspective. *Biochim. Biophys. Acta.* **1817**: 1134-1151
- 860 **Stemler A, Murphy J** (1983) Determination of the binding constant of H<sup>14</sup>CO<sub>3</sub><sup>-</sup> to the photosystem  
861 II complex in maize chloroplasts - effects of inhibitors and light. *Photochem. Photobiol.* **38**: 701–  
862 707
- 863 **Tikkanen M, Aro EM** (2012) Thylakoid protein phosphorylation in dynamic regulation of  
864 photosystem II in higher plants. *Biochim. Biophys. Acta* **1817**: 232-238
- 865 **Tomizioli M, Lazar C, Brugière S, Burger T, Salvi D, Gatto L, Moyet L, Breckels LM, Hesse**  
866 **A-M, Lilley K-S, Seigneurin-Berny D, Finazzi G, Rolland N, Ferro N** (2014) Deciphering  
867 thylakoid sub-compartments using a mass spectrometry-based approach. *Mol Cell Proteomics.* **13**:  
868 2147-2167
- 869 **Vass I, Kirilovsky D, Etienne A-L** (1999) UV-B radiation-induced donor- and acceptor-side  
870 modifications of Photosystem II in the cyanobacterium *Synechocystis* sp. PCC 6803 *Biochem.* **38**:  
871 12786-12794
- 872 **Vothknecht U C, Westhoff P** (2002) Biogenesis and origin of thylakoid membranes. *Biochim.*  
873 *Biophys. Acta* **1541**: 91-101
- 874 **Ware MA, Giovagnetti V, Belgio E, Ruban AV** (2015) PsbS protein modulates non-photochemical  
875 chlorophyll fluorescence quenching in membranes depleted of photosystems. *J. Photochem.*  
876 *Photobiol. B.* **152**: 301-307
- 877 **Watanabe M, Iwai M, Narikawa R, Ikeuchi M** (2009) Is the photosystem II complex a monomer  
878 or a dimer? *Plant Cell Physiol.* **50**: 1674–1680
- 879 **Wei L, Guo J, Ouyang M, Sun X, Ma J, Chi W, Lu C, Zhang L** (2010) LPA19, a Psb27 homolog

880 in *Arabidopsis thaliana*, facilitates D1 protein precursor processing during PSII biogenesis. *J. Biol.*  
881 *Chem.* **285**: 21391-21398

882 **Xiao Y, Huang G, You X, Zhu Q, Wang W, Kuang T, Han G, Sui SF, Shen JR** (2021) Structural  
883 insights into cyanobacterial photosystem II intermediates associated with Psb28 and Tsl0063. *Nat.*  
884 *Plants* **7**: 1132–1142

885 **Yamada M, Nagao R, Iwai M, Arai Y, Makita A, Ohta H, Tomo T** (2018) The PsbQ'protein  
886 affects the redox potential of the Q<sub>A</sub> in photosystem II. *Photosynthetica* **56**: 185–191

887 **Zabert J, Bohn S, Schuller SK, Arnolds O, Möller M, Meier-Credo J, Liauw P, Chan A,**  
888 **Tajkhorshid E, Langer JD, Stoll R, Krieger-Liszkay A, Engel BD, Rudack T, Schuller JM,**  
889 **Nowaczyk MM** (2021) Structural insights into a photosystem II assembly. *Nat. Plants* **7**: 524–538

890 **Zimmermann K, Heck M, Frank J, Kern J, Vass I, Zouni A** (2006) Herbicide binding and  
891 thermal stability of photosystem II isolated from *Thermosynechococcus elongatus*. *Biochim.*  
892 *Biophys. Acta* **1757**: 106-114

893  
894



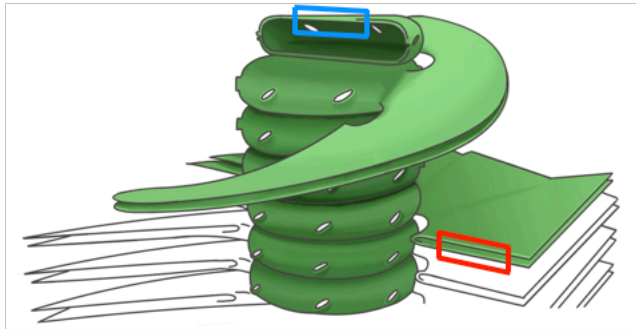

**LAMELLAL MEMBRANE**

**GRANAL MEMBRANE**

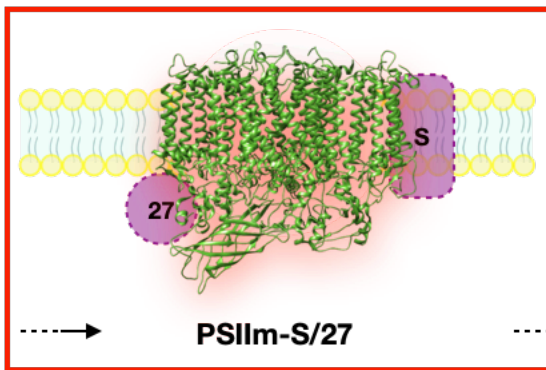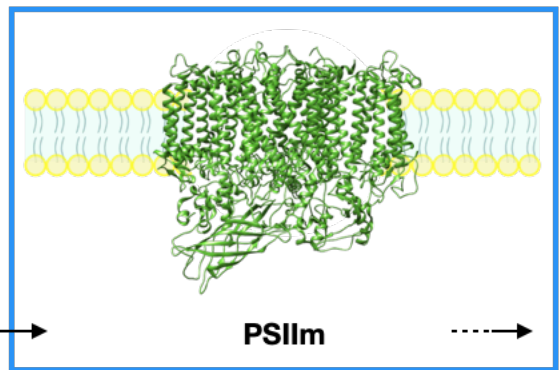

From assembly and repair pathway

To dimerization and antenna binding

Figure 1



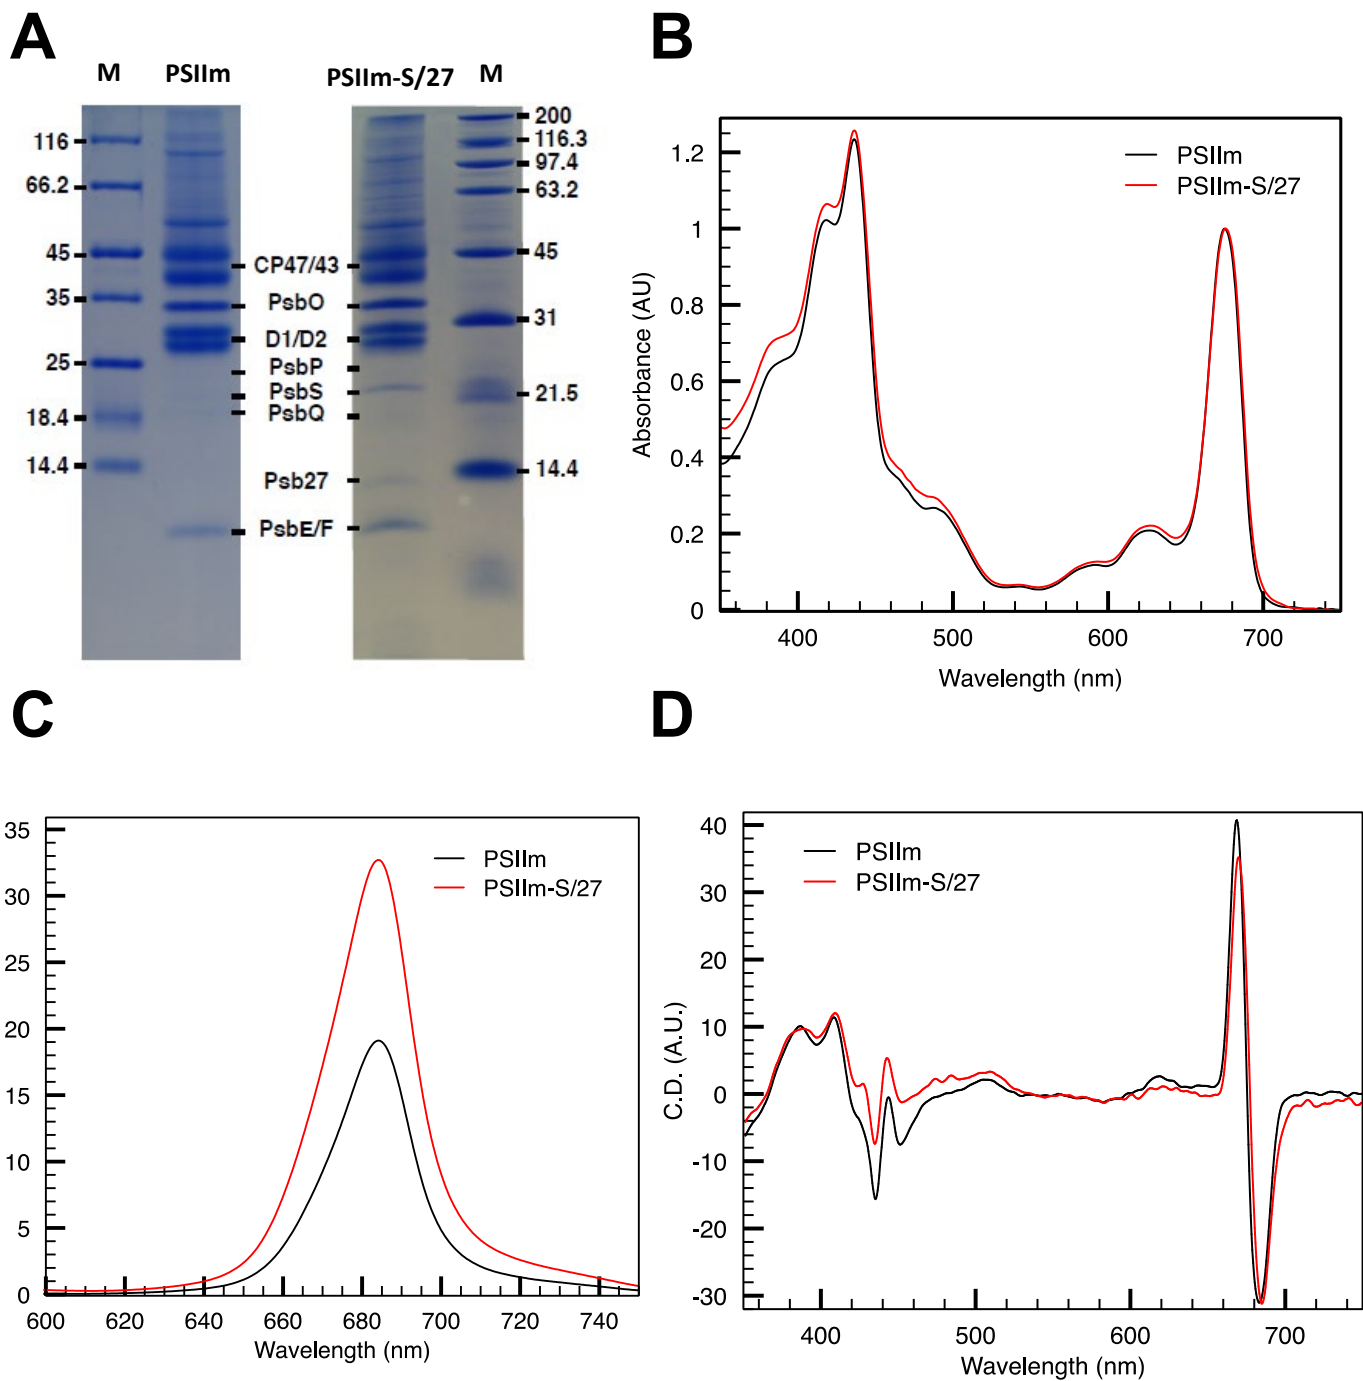

Figure 2

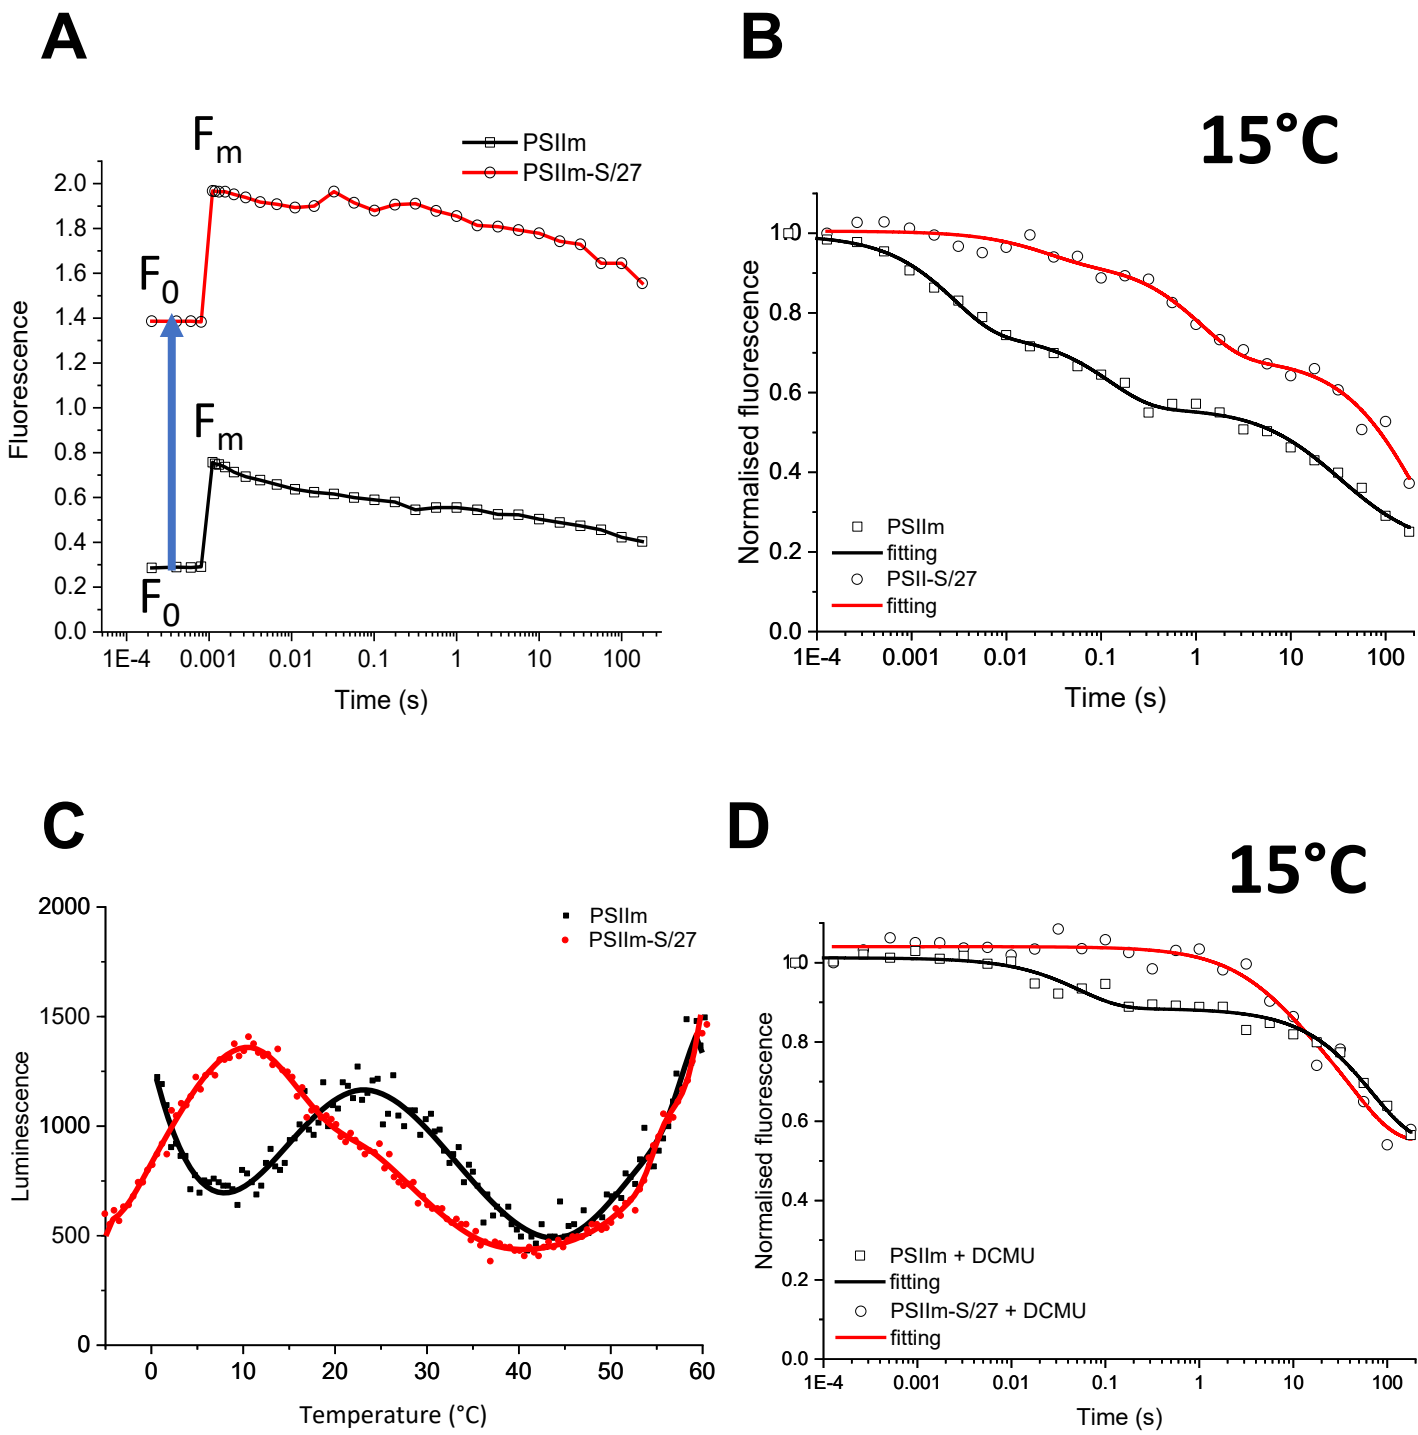

Figure 3

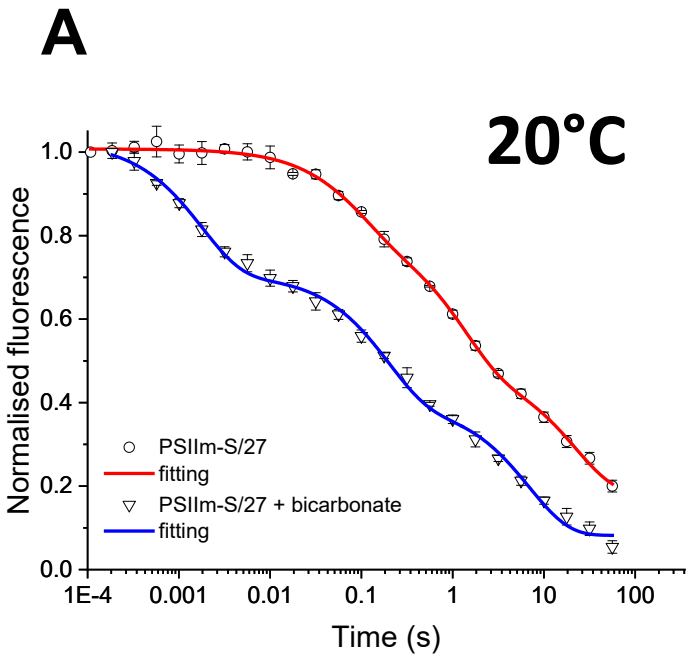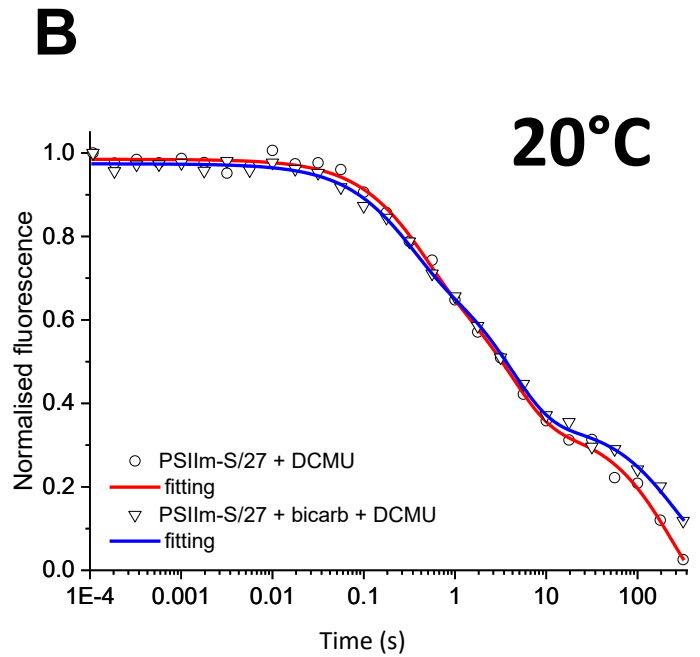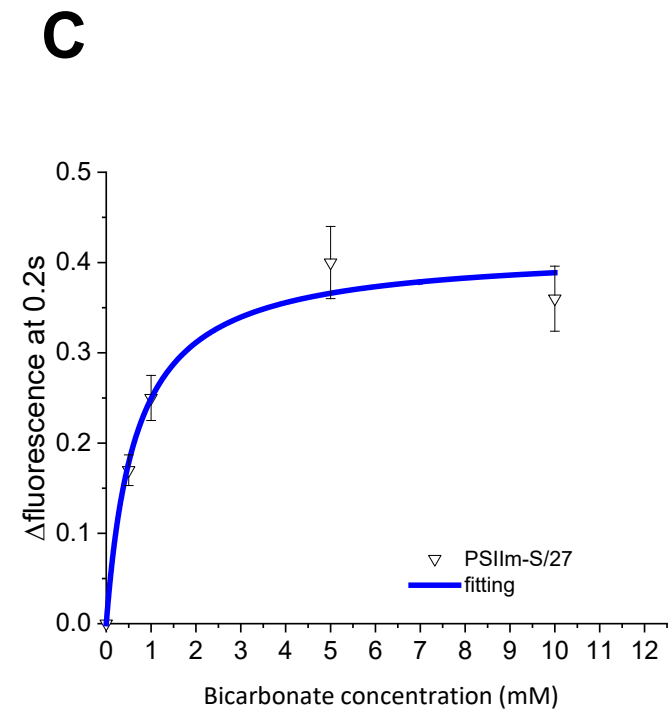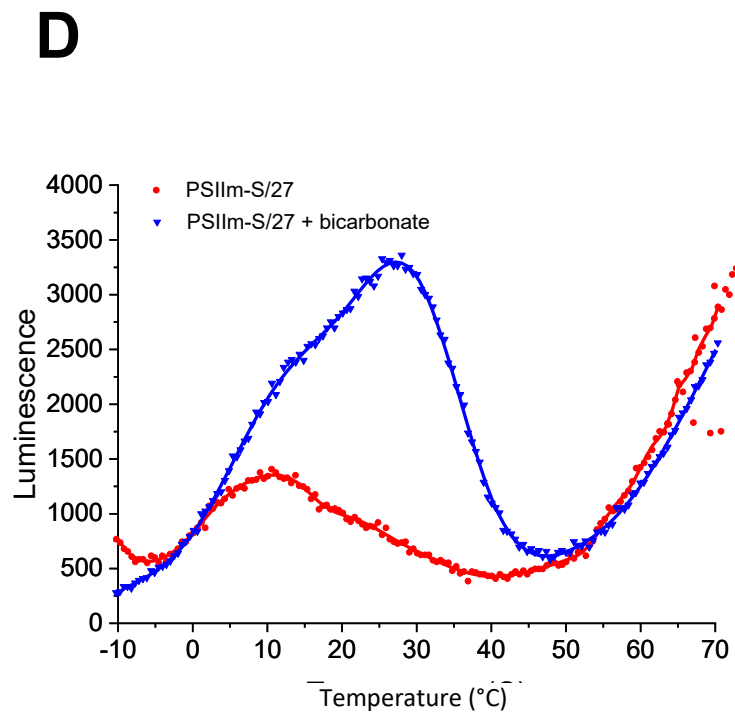

Figure 4

## Parsed Citations

- Albertsson P-A (2001)** A quantitative model of the domain structure of the photosynthetic membrane. *Trends in Plant Sci.* 6: 349-354  
Google Scholar: [Author Only](#) [Title Only](#) [Author and Title](#)
- Alfonso M, Montoya G, Cases R, Rodríguez R, Picorel R (1994)** Core antenna complexes, CP43 and CP47, of higher plant photosystem II. Spectral properties, pigment stoichiometry, and amino acid composition. *Biochem.* 33: 10494-10500  
Google Scholar: [Author Only](#) [Title Only](#) [Author and Title](#)
- Andersson B, Anderson J-M (1980)** Lateral heterogeneity in the distribution of chlorophyll-protein complexes of the thylakoid membranes of spinach chloroplasts. *Biochim. Biophys. Acta* 593: 427-440  
Google Scholar: [Author Only](#) [Title Only](#) [Author and Title](#)
- Avramov AP, Hwang HJ, Burnap RL (2020)** The role of Ca<sup>2+</sup> and protein scaffolding in the formation of nature's water oxidizing complex. *Proc. Natl. Ac. Sci. USA* 117: 28036-28045  
Google Scholar: [Author Only](#) [Title Only](#) [Author and Title](#)
- Bassi R, Dall'Osto L (2021)** Dissipation of light energy absorbed in excess: the molecular mechanisms. *Annu. Rev. Plant Biol.* 72: 47-76  
Google Scholar: [Author Only](#) [Title Only](#) [Author and Title](#)
- Bennoun P (1994)** Chlororespiration revisited: Mitochondrial-plastid interactions in *Chlamydomonas*. *Biochim. Biophys. Acta* 1186: 59-66  
Google Scholar: [Author Only](#) [Title Only](#) [Author and Title](#)
- Bergantino E, Segalla A, Brunetta A, Teardo E, Rigoni F, Giacometti GM, Szabò I (2003)** Light- and pH-dependent structural changes in the PsbS subunit of photosystem II. *Proc. Natl. Acad. Sci. USA* 100: 15265-15270  
Google Scholar: [Author Only](#) [Title Only](#) [Author and Title](#)
- Brinkert K, De Causmaecker S, Krieger-Liszkay A, Fantuzzi A, Rutherford AW (2016)** Bicarbonate-induced redox tuning in Photosystem II for regulation and protection. *Proc. Natl. Acad. Sci. U S A* 113: 12144-12149  
Google Scholar: [Author Only](#) [Title Only](#) [Author and Title](#)
- Caffarri S, Kouril R, Kerešič S, Boekema EJ, Croce R (2009)** Functional architecture of higher plant photosystem II supercomplexes. *EMBO J.* 28: 3052-3063  
Google Scholar: [Author Only](#) [Title Only](#) [Author and Title](#)
- Chen H, Zhang D, Guo J, Wu H, Jin M, Lu Q, Lu C, Zhang L (2006)** A Psb27 homologue in *Arabidopsis thaliana* is required for efficient repair of photodamaged photosystem II. *Plant Mol. Biol.* 61: 567-575  
Google Scholar: [Author Only](#) [Title Only](#) [Author and Title](#)
- Collu G, Farci D, Esposito F, Pintus F, Kirkpatrick J, Piano D (2017)** New insights into the operative network of FaEO, an enone oxidoreductase from *Fragaria x ananassa* Duch. *Plant Mol. Biol.* 94:125-136  
Google Scholar: [Author Only](#) [Title Only](#) [Author and Title](#)
- Correa-Galvis V, Poschmann G, Melzer M, Stühler K, Jahns P (2016)** PsbS interactions involved in the activation of energy dissipation in *Arabidopsis*. *Nat. Plants.* 2: 15225  
Google Scholar: [Author Only](#) [Title Only](#) [Author and Title](#)
- Crofts AR, Wraight CA (1983)** The electrochemical domain of photosynthesis. *Biochim. Biophys. Acta* 726: 149-185  
Google Scholar: [Author Only](#) [Title Only](#) [Author and Title](#)
- Dall'Osto L, Cazzaniga S, Bressan M, Paleček D, Židek K, Niyogi KK, Fleming GR, Zigmantas D, Bassi R (2017)** Two mechanisms for dissipation of excess light in monomeric and trimeric light-harvesting complexes. *Nat. Plants.* 3:17033  
Google Scholar: [Author Only](#) [Title Only](#) [Author and Title](#)
- Danielsson R, Suorsa M, Paakkarinen V, Albertsson P-A, Styring S, Aro E-M, Mamedov F (2006)** Dimeric and monomeric organization of photosystem II. *J. Biol. Chem.* 281: 14241-14249  
Google Scholar: [Author Only](#) [Title Only](#) [Author and Title](#)
- Dau H, Zaharieva I (2009)** Principles, efficiency, and blueprint character of solar-energy conversion in photosynthetic water oxidation. *Acc Chem Res.* 42: 1861-1870  
Google Scholar: [Author Only](#) [Title Only](#) [Author and Title](#)
- De Causmaecker S, Douglass JS, Fantuzzi A, Nitschke N, Rutherford AW (2019)** Energetics of the exchangeable quinone, QB, in Photosystem II. *Proc. Natl. Acad. Sci.* 116: 9458-9463  
Google Scholar: [Author Only](#) [Title Only](#) [Author and Title](#)
- Debus RJ, Campbell KA, Pham DP, Hays A-MA, Britt RD (2000)**. Glutamine 189 of the D1 polypeptide modulates the magnetic and

**redox properties of the manganese cluster and tyrosine Yz in Photosystem II. *Biochem. 39: 6275-6287***

Google Scholar: [Author Only](#) [Title Only](#) [Author and Title](#)

**Dietzel L, Bräutigam K, Steiner S, Schöffler K, Lepetit B, Grimm B, Schöttler MA, Pfannschmidt T (2011) Photosystem II supercomplex remodelling serves as an entry mechanism for state transitions in *Arabidopsis*. *Plant Cell. 23: 2964-2977***

Google Scholar: [Author Only](#) [Title Only](#) [Author and Title](#)

**Ducruet J, Vass I (2009) Thermoluminescence: experimental. *Photosynth. Res. 101: 195-204***

Google Scholar: [Author Only](#) [Title Only](#) [Author and Title](#)

**Fan M, Li M, Liu Z, Cao P, Pan X, Zhang H, Zhao X, Zhang J, Chang W (2015) Crystal structures of the PsbS protein essential for photoprotection in plants. *Nat. Struct. Mol. Biol. 22: 729-735***

Google Scholar: [Author Only](#) [Title Only](#) [Author and Title](#)

**Fey H, Piano D, Horn R, Fischer D, Schmidt M, Ruf S, Schröder WP, Bock R, Büchel C (2015) Isolation of highly active photosystem II core complexes with a His-tagged Cyt b559 subunit from transplastomic tobacco plants. *Biochim. Biophys. Acta 1777: 1501-1509***

Google Scholar: [Author Only](#) [Title Only](#) [Author and Title](#)

**Gachek DA, Holleboom CP, Tietz S, Kirchhoff H, Walla PJ (2019) PsbS-dependent and -independent mechanisms regulate carotenoid-chlorophyll energy coupling in grana thylakoids. *FEBS Lett. 593: 3190-3197***

Google Scholar: [Author Only](#) [Title Only](#) [Author and Title](#)

**Grasse N, Mamedov F, Becker K, Styring S, Rögner M, Nowaczyk MM (2011) Role of novel dimeric Photosystem II (PSII)-Psb27 protein complex in PSII repair. *J. of Biol. Chem. 286: 29548-29555***

Google Scholar: [Author Only](#) [Title Only](#) [Author and Title](#)

**Haniewicz P, De Sanctis D, Büchel C, Schröder WP, Loi M C, Kieselbach T, Bochtler M, Piano D (2013) Isolation of monomeric photosystem II that retains the subunit PsbS. *Photosynth Res. 118: 199-207***

Google Scholar: [Author Only](#) [Title Only](#) [Author and Title](#)

**Haniewicz P, Floris D, Farci D, Kirkpatrick J, Loi MC, Büchel C, Bochtler M, Piano D (2008) Isolation of Plant Photosystem II Complexes by Fractional Solubilization. *Front. Plant Sci. 6:1100***

Google Scholar: [Author Only](#) [Title Only](#) [Author and Title](#)

**Huang G, Xiao Y, Pi X, Zhao L, Zhu Q, Wang W, Kuang T, Han G, Sui SF, Shen JR (2021) Structural Insights into a dimeric Psb27-photosystem II complex from a cyanobacterium *Thermosynechococcus vulcanus*. *Proc. Natl. Acc. Sci. USA 118: e2018053118***

Google Scholar: [Author Only](#) [Title Only](#) [Author and Title](#)

**Johnson GN, Rutherford AW, Krieger A (1995) A change in the midpoint potential of the quinone Q(A) in Photosystem II associated with photoactivation of oxygen evolution. *Biochim. Biophys. Acta. 1229: 202-207***

Google Scholar: [Author Only](#) [Title Only](#) [Author and Title](#)

**Johnson M P (2016) Photosynthesis. *Essays Biochem. 60: 255-273***

Google Scholar: [Author Only](#) [Title Only](#) [Author and Title](#)

**Kirchhoff H (2019) Chloroplast ultrastructure in plants. *New Phytologist 223: 565-574***

Google Scholar: [Author Only](#) [Title Only](#) [Author and Title](#)

**Komenda J, Lupinkova L, Kopecky J (2002) Absence of the psbH gene product destabilizes Photosystem II complex and bicarbonate binding on its acceptor side in *Synechocystis* PCC 6803. *Eur. J. Biochem. 269: 610-619***

Google Scholar: [Author Only](#) [Title Only](#) [Author and Title](#)

**Komenda J, Sobotka R, Nixon PJ (2012) Assembling and maintaining the Photosystem II complex in chloroplasts and cyanobacteria. *Curr. Op. in Plant Biol. 15: 245-251***

Google Scholar: [Author Only](#) [Title Only](#) [Author and Title](#)

**Krausz E, Hughes JL, Smith P, Pace R, Årsköld SP (2005) Oxygen-evolving Photosystem II core complexes: a new paradigm based on the spectral identification of the charge-separating state, the primary acceptor and assignment of low-temperature fluorescence. *Photochem. Photobiol. Sci. 4: 744-753***

Google Scholar: [Author Only](#) [Title Only](#) [Author and Title](#)

**Krieger-Liszkay A (2005) Singlet oxygen production in photosynthesis. *J. of Exp. Bot. 56: 337-346***

Google Scholar: [Author Only](#) [Title Only](#) [Author and Title](#)

**Lavergne J, Leci E (1993) Properties of inactive Photosystem II centres. *Photosynth. Res. 35: 323-343***

Google Scholar: [Author Only](#) [Title Only](#) [Author and Title](#)

**Li XP, Gilmore AM, Caffarri S, Bassi R, Golan T, Kramer D, Niyogi KK (2004) Regulation of photosynthetic light harvesting involves intrathylakoid lumen pH sensing by the PsbS protein. *J Biol Chem. 279: 22866-22874***

Google Scholar: [Author Only](#) [Title Only](#) [Author and Title](#)

Liguori N, Campos SRR, Baptista AM, Croce R (2019) Molecular Anatomy of Plant Photoprotective Switches: The Sensitivity of PsbS to the Environment, Residue by Residue. *J Phys. Chem. Lett.* 10:1737-1742

Google Scholar: [Author Only](#) [Title Only](#) [Author and Title](#)

Liu H, Roose JL, Cameron JC, Pakrasi HB (2011) A genetically tagged Psb27 protein allows purification of two consecutive Photosystem II (PSII) assembly intermediates in *Synechocystis* 6803, a cyanobacterium. *J. of Biol. Chem.* 286: 24865-24871

Google Scholar: [Author Only](#) [Title Only](#) [Author and Title](#)

Ljungberg U, Åkerlund HE, Larsson C, Andersson B (1984) Identification of polypeptides associated with the 23 and 33 kDa proteins of photosynthetic oxygen evolution. *Biochim. Biophys. Acta.* 767: 145-152

Google Scholar: [Author Only](#) [Title Only](#) [Author and Title](#)

Mamedov F, Nowaczyk MM, Thapper A, Rogner M, Styring S (2007) Functional characterization of monomeric Photosystem II core preparations from *Thermosynechococcus elongatus* with or without the Psb27 protein. *Biochem.* 46: 5542-5551

Google Scholar: [Author Only](#) [Title Only](#) [Author and Title](#)

Melis A (1985) Functional properties of Photosystem II $\beta$  in spinach chloroplasts. *Biochim Biophys Acta.* 808: 334-342

Google Scholar: [Author Only](#) [Title Only](#) [Author and Title](#)

Nickelsen J, Rengstl B (2013) Photosystem II assembly: from cyanobacteria to plants. *Annu. Rev. Plant Biol.* 64: 609-635

Google Scholar: [Author Only](#) [Title Only](#) [Author and Title](#)

Nixon PN, Trost JT, Diner BA (1992) Role of carboxyl terminus of polypeptide D1 in the assembly of a functional water-oxidizing manganese cluster in Photosystem II of the cyanobacterium *Synechocystis* sp. PCC 6803: assembly requires a free carboxyl group at C-terminal position 344. *Biochem.* 31:10859-10871

Google Scholar: [Author Only](#) [Title Only](#) [Author and Title](#)

Niyogi KK, Truong TB (2013) Evolution of flexible non-photochemical quenching mechanisms that regulate light harvesting in oxygenic photosynthesis. *Curr. Op. Plant Biol.* 16: 307-314

Google Scholar: [Author Only](#) [Title Only](#) [Author and Title](#)

Nowaczyk MM, Hebel R, Schlodder E, Meyer HE, Warscheid B, Rögner M (2006) Psb27, a cyanobacterial lipoprotein, is involved in the repair cycle of photosystem II. *Plant Cell.* 18: 3121-3131

Google Scholar: [Author Only](#) [Title Only](#) [Author and Title](#)

Piano D, El Alaoui S, Korza HJ, Filipek R, Sabala I, Haniewicz P, Buechel C, De Sanctis D, Bochtler M (2010) Crystallization of the photosystem II core complex and its chlorophyll binding subunit CP43 from transplastomic plants of *Nicotiana tabacum*. *Photosynth. Res.* 106: 221–226

Google Scholar: [Author Only](#) [Title Only](#) [Author and Title](#)

Porra RJ, Thompson WA, Kriedmann PE (1989) Determination of accurate extinction coefficients and simultaneous equations for assaying chlorophylls a and b with four different solvents: verifications of the concentration of chlorophyll standards by atomic absorption spectroscopy. *Biochim. Biophys. Acta* 975: 384–394

Google Scholar: [Author Only](#) [Title Only](#) [Author and Title](#)

Pospíšil P (2016) Production of Reactive Oxygen Species by Photosystem II as a Response to Light and Temperature Stress. *Front Plant Sci.* 7: 1950

Google Scholar: [Author Only](#) [Title Only](#) [Author and Title](#)

Puthiyaveetil S, Tsabari O, Lowry T, Lenhart S, Lewis RR, Reich Z, Kirchhoff H (2014) Compartmentalization of the protein repair machinery in photosynthetic membrane. *Proc. Natl. Acad. Sci. USA* 111: 15839-15844

Google Scholar: [Author Only](#) [Title Only](#) [Author and Title](#)

Roach T, Krieger-Liszkay A (2012) The role of the PsbS protein in the protection of photosystems I and II against high light in *Arabidopsis thaliana*. *Biochim. Biophys. Acta.* 1817: 2158-2165

Google Scholar: [Author Only](#) [Title Only](#) [Author and Title](#)

Roose JL, Pakrasi HB (2004) Evidence that D1 processing is required for manganese binding and extrinsic protein assembly into Photosystem II. *J. Biol. Chem.* 279: 45417-45422

Google Scholar: [Author Only](#) [Title Only](#) [Author and Title](#)

Roose JL, Pakrasi HB (2008) The Psb27 protein facilitates manganese cluster assembly in photosystem II. *J. Biol. Chem.* 283: 4044-4050

Google Scholar: [Author Only](#) [Title Only](#) [Author and Title](#)

Ruban AV, Johnson M P (2015) Visualizing the dynamic structure of the plant photosynthetic membrane. *Nat. Plants* 1: 15161

Google Scholar: [Author Only](#) [Title Only](#) [Author and Title](#)

Ruban AV (2016) Nonphotochemical chlorophyll fluorescence quenching: mechanism and effectiveness in protecting plants from photodamage. *Plant Physiol.* 170: 1903-1916



Google Scholar: [Author Only](#) [Title Only](#) [Author and Title](#)

**Rutherford AW, Crofts AR, Inoue Y (1982) Thermoluminescence as a probe of Photosystem II photochemistry: the origin of the flash induced glow peaks. *Biochim. Biophys. Acta* 682: 457-465.**

Google Scholar: [Author Only](#) [Title Only](#) [Author and Title](#)

**Rutherford AW, Krieger-Liszka A (2001) Herbicide-induced oxidative stress in Photosystem II. *Trends In Biochem. Sc.* 26: 648-653**

Google Scholar: [Author Only](#) [Title Only](#) [Author and Title](#)

**Rutherford AW, Osyczka A, Rappaport F (2012) Back-reactions, short-circuits, leaks and other energy wasteful reactions in biological electron transfer: Redox tuning to survive life in O<sub>2</sub>. *FEBS Lett.* 586: 603-616**

Google Scholar: [Author Only](#) [Title Only](#) [Author and Title](#)

**Rutherford AW, Paterson DR, Mullet JE (1981) A light-induced spin-polarized triplet detected by EPR in Photosystem II reaction centers. *Biochim. Biophys. Acta* 635: 205-214**

Google Scholar: [Author Only](#) [Title Only](#) [Author and Title](#)

**Sacharz J, Giovagnetti V, Ungerer P, Mastroianni G, Ruban AV (2017) The xanthophyll cycle affect reversible interactions between PsbS and light-harvesting complex II to control non-photochemical quenching. *Nat. Plant.* 3: 16225**

Google Scholar: [Author Only](#) [Title Only](#) [Author and Title](#)

**Shevela D, Eaton-Rye JJ, Shen JR, Govindjee (2012) Photosystem II and the unique role of bicarbonate: a historical perspective. *Biochim. Biophys. Acta.* 1817: 1134-1151**

Google Scholar: [Author Only](#) [Title Only](#) [Author and Title](#)

**Stemler A, Murphy J (1983) Determination of the binding constant of H<sub>2</sub>CO<sub>3</sub> to the photosystem II complex in maize chloroplasts - effects of inhibitors and light. *Photochem. Photobiol.* 38: 701-707**

Google Scholar: [Author Only](#) [Title Only](#) [Author and Title](#)

**Tikkanen M, Aro EM (2012) Thylakoid protein phosphorylation in dynamic regulation of photosystem II in higher plants. *Biochim. Biophys. Acta* 1817: 232-238**

Google Scholar: [Author Only](#) [Title Only](#) [Author and Title](#)

**Tomizoli M, Lazar C, Brugière S, Burger T, Salvi D, Gatto L, Moyet L, Breckels LM, Hesse A-M, Lilley K-S, Seigneurin-Berny D, Finazzi G, Rolland N, Ferro N (2014) Deciphering thylakoid sub-compartments using a mass spectrometry-based approach. *Mol Cell Proteomics.* 13: 2147-2167**

Google Scholar: [Author Only](#) [Title Only](#) [Author and Title](#)

**Vass I, Kirilovsky D, Etienne A-L (1999) UV-B radiation-induced donor- and acceptor-side modifications of Photosystem II in the cyanobacterium *Synechocystis* sp. PCC 6803 *Biochem.* 38: 12786-12794**

Google Scholar: [Author Only](#) [Title Only](#) [Author and Title](#)

**Vothknecht U C, Westhoff P (2002) Biogenesis and origin of thylakoid membranes. *Biochim. Biophys. Acta* 1541: 91-101**

Google Scholar: [Author Only](#) [Title Only](#) [Author and Title](#)

**Ware MA, Giovagnetti V, Belgio E, Ruban AV (2015) PsbS protein modulates non-photochemical chlorophyll fluorescence quenching in membranes depleted of photosystems. *J. Photochem. Photobiol. B.* 152: 301-307**

Google Scholar: [Author Only](#) [Title Only](#) [Author and Title](#)

**Watanabe M, Iwai M, Narikawa R, Ikeuchi M (2009) Is the photosystem II complex a monomer or a dimer? *Plant Cell Physiol.* 50: 1674-1680**

Google Scholar: [Author Only](#) [Title Only](#) [Author and Title](#)

**Wei L, Guo J, Ouyang M, Sun X, Ma J, Chi W, Lu C, Zhang L (2010) LPA19, a Psb27 homolog in *Arabidopsis thaliana*, facilitates D1 protein precursor processing during PSII biogenesis. *J. Biol. Chem.* 285: 21391-21398**

Google Scholar: [Author Only](#) [Title Only](#) [Author and Title](#)

**Xiao Y, Huang G, You X, Zhu Q, Wang W, Kuang T, Han G, Sui SF, Shen JR (2021) Structural insights into cyanobacterial photosystem II intermediates associated with Psb28 and Tsl0063. *Nat. Plants* 7: 1132-1142**

Google Scholar: [Author Only](#) [Title Only](#) [Author and Title](#)

**Yamada M, Nagao R, Iwai M, Arai Y, Makita A, Ohta H, Tomo T (2018) The PsbQ' protein affects the redox potential of the QA in photosystem II. *Photosynthetica* 56: 185-191**

Google Scholar: [Author Only](#) [Title Only](#) [Author and Title](#)

**Zabert J, Bohn S, Schuller SK, Arnolds O, Möller M, Meier-Credo J, Liauw P, Chan A, Tajkhorshid E, Langer JD, Stoll R, Krieger-Liszka A, Engel BD, Rudack T, Schuller JM, Nowaczyk MM (2021) Structural insights into a photosystem II assembly. *Nat. Plants* 7: 524-538**

Google Scholar: [Author Only](#) [Title Only](#) [Author and Title](#)



Zimmermann K, Heck M, Frank J, Kern J, Vass I, Zouni A (2006) Herbicide binding and thermal stability of photosystem II isolated from *Thermosynechococcus elongatus*. *Biochim. Biophys. Acta* 1757: 106-114

Google Scholar: [Author Only](#) [Title Only](#) [Author and Title](#)
